# Supplementary material
Source: MDPI journal article supplement (https://www.mdpi.com/2073-4344/11/9/1038)
Supplement: s1 [file s1]

## Supplementary Materials

### From Cell-Free Protein Synthesis to Whole-Cell Biotransformation: Screening and Identification of Novel $\alpha$ -Ketoglutarate-Dependent Dioxygenases for Preparative Scale Synthesis of Hydroxy-L-Lysine

Jascha Rolf <sup>1†</sup>, Philipp Nerke <sup>1†</sup>, Annette Britner <sup>1</sup>, Sebastian Krick <sup>1</sup>, Stephan Lütz <sup>1</sup> and Katrin Rosenthal <sup>1\*</sup>

<sup>1</sup> Chair for Bioprocess Engineering, Department of Biochemical and Chemical Engineering, TU Dortmund University, D-44227 Dortmund, Germany; jascha.rolf@tu-dortmund.de (J.R.); philipp.nerke@tu-dortmund.de (P.N.); annette.britner@tu-dortmund.de (A.B.); sebastian.krick@tu-dortmund.de (S.K.); stephan.luetz@tu-dortmund.de (S.L.)

\* Correspondence: katrin.rosenthal@tu-dortmund.de (K.R.); Tel.: +49-231-755-5115

† These authors have contributed equally to this work.

Table S1. Primer sequences

| Primer | Sequence (5'→3')                                     |
|--------|------------------------------------------------------|
| PPN070 | TTTAACTTTAAGAAGGAGATATACAATGTCCTCGCTGTTCTCG          |
| PPN071 | GGTGGTGGTGGTGGTGCTCGAGTGCCTGAAGCTGGCC                |
| PPN072 | TTTAACTTTAAGAAGGAGATATACAATGTCCTCGGTGTT              |
| PPN073 | GGTGGTGGTGGTGGTGCTCGAGTGCAGGAGAAGCTGGC               |
| PPN074 | TTTAACTTTAAGAAGGAGATATACAATGCTCACCATCGAC             |
| PPN075 | GGTGGTGGTGGTGGTGCTCGAGTGCAGCCCCGGAT                  |
| PPN088 | TTAACTTTAAGAAGGAGATATACATATGCAGCTGGGTGTGCC           |
| PPN089 | GGTGGTGGTGGTGGTGCTCGAGTGCAGTCGGCTGCGCGCT             |
| PPN090 | TTAACTTTAAGAAGGAGATATACATATGGATAATGTGAGCCAAGAAATTGTG |
| PPN091 | GGTGGTGGTGGTGGTGCTCGAGTGCCTAACCGGTGTAAATCAACCAGC     |
| PPN092 | TTAACTTTAAGAAGGAGATATACATATGGGTTGGAACATTTTACCAATGC   |
| PPN093 | GGTGGTGGTGGTGGTGCTCGAGTGCCTGCGGACGACGATCGC           |
| PPN094 | TTAACTTTAAGAAGGAGATATACATATGCATCGTATTGAAGAAGAACCGT   |
| PPN095 | GGTGGTGGTGGTGGTGCTCGAGTGCCTGCTCAGCGGAATCGG           |
| PPN096 | TTAACTTTAAGAAGGAGATATACATATGCAGCAGCAAGGTTGG          |
| PPN097 | GGTGGTGGTGGTGGTGCTCGAGTGCATCACGCACCGGTTCCG           |

Table S2. Gene sequences

| Encoded Protein | Gene sequence                                                                                                                                                                                                                                                                                                                                                                                                                                                                                                                                                                                                                                                                                                                                                                                                                                                                                                                                                                                                                                                                                                                                                                                     |
|-----------------|---------------------------------------------------------------------------------------------------------------------------------------------------------------------------------------------------------------------------------------------------------------------------------------------------------------------------------------------------------------------------------------------------------------------------------------------------------------------------------------------------------------------------------------------------------------------------------------------------------------------------------------------------------------------------------------------------------------------------------------------------------------------------------------------------------------------------------------------------------------------------------------------------------------------------------------------------------------------------------------------------------------------------------------------------------------------------------------------------------------------------------------------------------------------------------------------------|
| <i>CaciKDO</i>  | ATGAAGAACCTGTCTGCGTATGAAGTGTATGAATCGCCGAAGACCAGCGG<br>AGAGTCACGTACCGAAGCCGTTTCGGAGGCCGCTTCGAATCCGACCCCCG<br>AAGTGAGCGCAATCCTAGTCCTGACCTCCTCCGAAGCCTCGACGCTGGAGC<br>GCGTCGCCGACCTCGTGACCGCGCACGCGCTGTATGCCGCTCACGATTTCT<br>GTGCCCAGGCCAGCTGGCCGCCGCCGAAGTGGCGTCGCGGGTCTGTTGCC<br>CGGTTGCAGGAGTTCGCCTGGGGCGACATGAACGAGGGCCACCTTCTGAT<br>AAAAGGCCTGCCGACAGTCCGCTCCCTGCCACCGACACCGACGTCCAACGT<br>GCACGCCGTGCGCCGACGACGCCGATGTCGCGCTACCAGGCCCTCATCA<br>ATGAGTGCGTGGGGCGCATGATTGCCTACGAGGCCGAGGGGACGGCCA<br>CACCTTCCAGGACATGGTCCCGAGCGCCATGAGCGCGCACTCGCAGACCA<br>GTCTCGGCTCGGCGGTTGAGCTCGAACTGCACACCGAGCAGGCCTTCAGT<br>CCGCTGCGTCCGGAATTCGTACGCTGGCCTGTCTTCGCGGCGATCCACGA<br>GCCCTGACTTACCTGTTCTCGGCCCCGCAACTGGTCGCGACGCTGACGACA<br>CAGGAAATCGCCATGCTGCGCGAGCCCATGTGGACCACCACCGTCGACGA<br>GTCCTTCTGGCGGAGGGGCGTACGTTCTGCTCGGCTTCGAGCGCGGTC<br>CGATCCCGATATTGAGCGGTGCCGACGACGATCCGTTTCATGCTTTCGACC<br>AGGATCTGATGCGGGGGATCTCGGCGCCCCGCGCAGGAACTCCAACAGACT<br>GTGATCCGCGCCTACTATGCCGAGCGCGTCAGCCACTGCCTCGACCCGGT<br>GAGATGCTCCTCATCGACAACCGGCGCGCCGTCCACGGCAGGTCGATCTTC<br>GCCCCGCGTTTCGACGGCGCTGACCGGTTCTTTCCAGAAGCTTCATCGTG<br>GCCGACGGATCGCGCAGTCGGCACGCGCGTTCTTCTTCGGCCGCGTCGTC<br>TCTGCGAGGTTAGCTAA |
| <i>KradKDO</i>  | ATGTCCTCGCTGTTCTCGACTCCTCCGCCACGTGCCGACCCTGTTTCGAGC<br>TGCCCGCGCCCCAGCGGGCCGCGCTGGCCGCGCTGGGCGCGCGCCTGACC<br>GCGGACCCGGTGACCGAGCCCCGACGCCTTCGGCCGCCAGGCGCGCCTGCT<br>GGCCCGCGAACTGTCCGTCGAGGTCACCGAGGCCCTGTGGGCGTTTCGAGG<br>AACGGGGATCGGACTCCGGGGTCTCGTCTGCGCGGCCTGGAGGTCGGT<br>GAGTGCCGCCACCCCGGCCGACAACACCGGCGGGATCGGCGGGCGCA<br>CCCTGCTCGCCCGCCAGCAGGCGATCGTCAGCCACGCGCTGGGGCACATG<br>GTCGGCTACGCCGCCGAGGGCCACGGGCACCTCCTGCAGGACATGGTCCC<br>CAACGCCAGGCTCGCCGCGACCCAGCAGTCGCGAGGGCTCCCGGGTGGAGC<br>TGGAGGCGCACACCGAGCAGTGCTTCTCCGACCTGCGCCCCGACTACGTC<br>GTCCTGGGCTGCCTGCGCGGGGACGCCGACGCCGACCTACGCGTTCCG<br>CGCCCTGGACCTGCTGGCCACGTGGACCCACCGACGTCATGGAGCTGTT<br>CCGGCCGCTGTGGACGACGCTGGTCGACGAGTCCTTCGCCGACTTCCTCGA<br>CACCCGCGAGGTGCGCGGGGCGTTCTCCATCCTCTCCGGCGACGTCGACG<br>ACCCGACGATGCTCGTCGACCAGGACCTCATGCACGGCATACCAAGCAC<br>GCCCAGGCCCTGCTGGAGCGCGTGCTGGAGATCTACGTCGCCACCGCCA<br>CGCCGTCGTCCTCCAGCCCCGGGGACGTGCTGCTGCTGGACAACCTGCGCG<br>CCATGCACGGCCGCTCGCCGTTCCGCCGCGCTTCGACGGCACCGACCGGT<br>TCATCTCCCGGGGTTTCGTCGTCCGCGACCTGCGCCGCTCCCGCTTCGCC<br>GCCCCGGCGGGAACCGCGTCGTGCAGGCCAGCTTCAGCTGA                                                                                           |

*Krhi*KDO

ATGTCCTCGGTGTTCTCGACTCCTCGGCCGTGGTGCCGACCGTCCGTGAA  
CTGGCGACGGAGGAGCGTTCCGCGCTCGCCGCGCTGGGCTCACGGGTGA  
GCGCCGACCCCGTGACCGACCCGAGGCCTTCGGCCGCCAGGCCCGGCTC  
CTGGCCCGCGAGCTGCCGAGGGCCTGGCCGAGACCCTGTGGGCCTTCGA  
GGAACGCGGCTCCGACTCCGGCGTCTCGTCCTGCGCGGTCTCGACGTGCG  
GCGACCTGCCCCCGACGCCGCCGGACAACACCGGCGGCGTCGGCGGGCG  
CACCTGCTCGCCCGGACGAGGCCGTGTCAGCCACGCCCTCGGGCACAT  
GGTCGGCTACGCCGCCGAGGGCCACGGGCACCTGCTGCAGGACATGGTCC  
CCAACGCCAAGCTCGCCGCGACCCAGCAGTCGCAGGGGCTCGCGCGTCGAG  
CTGGAGGCCACACCGAGCAGTGCTTCTCCGCGCTGCGCCCCGACTACGTC  
GTCCTCGGCTGCCTGCGCGGCGACGCCGACGCCACCTACGCTTCCGC  
GCCCTCGACCTGCTCGGGCACGTGACCCGACCGAGGTCATGGAGCTGTT  
CCGGCCGCTGTGGACGACCTCGTCGACGAGTCGTTCCGCCACTTCCTCGA  
CACCCGCGAGGTGCGCGGCCCGTTCTCGATCCTGTCCGGCGAGATCGACG  
ACCCGACGATGCTCATCGACCAGGACCTCATGCACGGCATACCAAGCGC  
GCCAGGCGCTGCTGGAGCGGGTGCTGGAGATCTACGTCGCCACCGGCA  
CGCCGTCGTCCTGCAGCCCGGCGACGTGCTGCTGCTGGACAACCTGCGCG  
CCATGCACGGACGGTCCCCGTTACCCCGCGCTTCGACGGCACTGACCGGT  
TCATCTCCCGCGGTTTCGTGCTGCGCGACCTGCGCCGTTCCCGCTTCGCCG  
CCCCGGCGGCGGCCGCGTCGTGCAGGCCAGCTTCTCCTGA

*Mint*KDO

ATGCTACCATCGACCCGCTTCGCGACCCGACAGGGGTACGTGCGCCAGGC  
TCGACTGTTGTCCGCCAGCTACCTTGGGCTCTTCGTGAAACGGTGGTTCGA  
CTTCGAAACCTACGGAGACGGAGGCCTTCTGGTAACCGGATTAGAAGTCG  
GCTCGGTGCGCCGAACGCCTGACAGTCCGGCAAACGACGTACGCATAAC  
ACGCCCATAGCCGCTGCCTCGGCGCTGTTGCTGCGGTGCATCGCCAACTG  
GTTGGCTACCGTGCCGAGTCATGGGGTCGGATCTGCCAGTCCGTTATCCCG  
ACCAAAGGCGATGCCAGCCAGCAGAAGTCGACCGGTTCTCGGGTATGCCT  
GGAGTGCCCACTGAGCAGGCCTTCAATCTGCTCACGAGGCCCGACTACG  
TCGCCCTCGGTTGCCTACGGGGCGATCCCCACGCCGCGACCTTCATGCTGT  
CGGCGCGCGCTCTGCAAGAGCACCTGCCAGCTCGGTGGTGGCCTGCTG  
CGGGAGCCGATGTTCAACACGCGGATCGATCAGTCCTTCATCGAAGGCGG  
CGTCCCTGACGAAGTCCGCGGCCCGATCCCGGTCTTGCTGCGGCCCTTGA  
GGATCCGGTGATCACCTTCGACGAGGATCTGATGTGGGGCAACAGTCCCA  
AACACCAGGCCGCCTTGGAGATGGTGAAGACGGTTTGGGCCGATCACCGC  
AGCAGCGTCGTCCTGAAGCGCGGCGATGTGCTGATCATCGACAACAGCCG  
AGCTATCCACGGCCGACGCGCATTCGGCCACGGTGGGACGGTGGGGATC  
GCTGGCTGTGCAGGTTGCAGGGCGTGTGCGATTTGACCAGAACCCGGGAT  
GCGCGGCGACCTCAATCGCCGGTGATCGAAATCCGGGGCTGCTGA

*Cpin*KDO

ATGAGACCCTTAGACGTGACACCCACAATTAGCCAGGAGCCCAGGACCTT  
CCGCGCACTATGCATTTTGCTGCTGAACCTCCTTACAGCCTTTGATAATAG  
ATATTACTGAAGAAGAAAACTGGAAATTACCTATATCGGGAAAAAGCTA  
AAAAGAAAGTATAAAAGCTATGATGATCCCGGTTTTATTTCAATGCTGCAC  
TTAAATGCCTATACGCTGCTACCGGAGCGTATAGCAAAGGTGCTGAGTAAT  
TTCGGTACAGACTTTTCCGACCAGCAATACGGAGCTGTCGTATTGCGTGGA  
CTGATAGAAATAGGTCAGGATGAATTAGGCCCAACCCACGTTCTGGCA  
GGAAACCGACCATGAAAAGATTATGGAATATGGCTTCATTCCTCCTTATT

ACATGGCGCTGTACCATCCAAACCCGTCGAGTATTTTCGCGCAGCGAAAAAG  
 GTGGTGGCTTAATGCACGCGATTATTCCTGATGAGAATATGAGCTTTACAC  
 AAACAGGCTCAGGTTCCCGTACAGATCTTTTTGTACATACAGAAGATGCTT  
 TCCTGCATAATGCGGCTGATTTTCTGAGTTTTCTTTTCTGCGGAATGAAGA  
 ACGTGTGCCTTCCACCTTATATTCTATCCGCTCTCATGGCAGACCGGATGCG  
 ATATTACAGGAGCTTTTCAAGCCTATCTATAAGTGTCCGAAGGATGCGAAC  
 TATGCTTCCGAAGAAGCCCTGGGAGATGACATCCGTACTTCTGTTTTATAT  
 GGTAGCAGATCCGCTCCCTTCATGCGCTTTGATGCTGCGGAACAGATTTAT  
 AATGAAGACGCCAATCAGGATCCTGAAGCTTTACATAATCTGAAAAGATTC  
 TGGGAAGAGGCGCGCAAACCTGATATATAATGACTTCGTTCTGAGTCAGG  
 TGACCTGATCTTTGTGAATAATCATCTTTGTGCCCATGGCCGGAATGCTTTC  
 CTGGCAGGCTTCAGAGAGGAAAATGGTCAGCTGGTAAAATGCGAACGCC  
 GTCTTATGTTACGTATGATGAGCAAAACCAGCCTGATTAACATCCGTGAAG  
 TAACCCACCCCGAAAACCCTTATCTCATCATGGAAGAGCACTACGGAAAAG  
 TATATAGCGCTCACCTGGCAAACCTTTAA

*NkorKDO*

ATGGAACCATCATCGAATCTCGTCAGCGTATCAACTCTCCGGGTGTTCTG  
 CCGCCGCGCTGTCTCCGCTGATCGTTGACGTTACCCGAAAGAACGTGCG  
 TCTATCTCTAACGTTGCGAACATCCTGCTGAAAGCGTTCGGTCACTACGAA  
 CACCCGGACTTCATCTCTGCGCTGCACCTGAACGCGTTCAGCTGCTGCCG  
 GAACGTATCGCGGGTATCCTGTCTCGTTTCGGTACCGACTTCTCTCGTCACC  
 AGTACGGTGCGCTGGTTTTCCGTGGTCTGACCGAAGTTGACCAGGAAGCG  
 CTGGGTCCGACCCCGCCGTCTTGGAAGAAACCGACTACTCTAAACTGGTT  
 AAATACGGTTTCATCTGCTCTCTGCTGCACGGTGCGATCCCGTCTAAACCG  
 GTTCAGTACTACGCGCAGCGTAAAGGTGGTGGTCTGCTGCACGCGGTTAT  
 CCCGGACGAAAAAATGTCTCACACCCAGACCGTTCTGGTTCTCGTACCGA  
 CCTGTTCTGTTACACCGAAGACGCGTTCCTGTTCAACAGGCGGACTTCCT  
 GTCTTTCCTGTTCTGCGTAACGAAGAACAGGTTCCGTCTACCCTGTACTCT  
 ATCCGTTCTACGGTGACACCAACGCGATCATGGCGGAACGTTCAAACCG  
 ATCTACAAATGCCCCGAAAGACGCGAACTACGCGGACGACGAAAACGCGG  
 GTGAAGAAGTTACCACCTCTATCCTGTACGGTAACCGTGAACGTCCGTTCA  
 TCCGTTTCGACGCGGCGGAACAGATCTACAACGAAAAAGCGGGTCAGACC  
 CCGGAAGCGATGCACAACCTGGTTTCGTTTCTGGGACGAAGCGAAACAGCT  
 GATCTACAACGACTTCGTTCCGGACTCTGGTGACCTGATCTTCGTTAACAAC  
 CACCTGTGCGCGCACGGTCGTAACCTTTTCGTTGCGGGTTACCGTAACGAA  
 AACGGTCAGCTGGTTAAATGCGAACGTCGTCGATGCTGCGTATGATGTCT  
 AAAACCTCTCTGATCAACATCCAGTCTGTTACCCAGCTGAACGACCCGTACT  
 TCATCATGGAAGAACAACACTACGGTAAACTGTTCCACTCTCAGCAGTAA

*FspeKDO*

ATGAAATCTCAGTCTATCATGTCTGTTGAACGTTCTGCGGAAACCTCTCTGA  
 CCCTGGAAATCCCGACCTCTCCGCTGATCATCAAAATCACCCAGCAGGAAC  
 GTAACATCCTGTCTAACGTTGGTAACCTGCTGGTTAAAGCGTTCGGTAACT  
 ACGAAAACCCGGACTACATCGCGTCTCTGCACCTGCACGCGTTCAGCTGC  
 TGCCGGAACGTATCACCCGTATCCTGTCTCAGTTCGGTTCTGACTTCTCTGC  
 GGAACAGTACGGTGCGATCGTTTTCCAGGGTCTGATCGAAGTTGACCAGG  
 ACGACCTGGGTCCGACCCCGCCGAACTGGCAGGGTGCGGACTACGGTAAA  
 CTGAACAAATACGGTTTCATCTGCTCTCTGCTGCACGGTGCGGTTCCGTCTA  
 AACCGGTTCACTACTACGCGCAGCGTAAAGGTGGTGGTCTGCTGCACGCG

GTTATCCCGGACGAAAAAATGGCGGCGACCCAGACCGGTTCTGGTTCTAA  
AACCGACCTGTTCTTCACACCGAAGACGCGTTCCTGTCTAACCGGCGGA  
CTTCCTGTCTTTCTGTACCTGCGTAACGAAGAACGTGTTCCGTCTACCCTG  
TACTCTATCCGTTCTCACGGTAAATGAACCCGGTTATGAAAAAAGTGTTC  
GAACCGATCTACCAGTGCCCCGAAAGACGCGAACTACAACGACGAAGACGT  
TGCGAACTCTGGTCCGACCGCGTCTGTTCTGTACGGTAACCGTGAAGTCC  
GTTTCATCCGTTTCGACGCGGCGGAACAGATCTTCAACGAAAACGCGGGTC  
AGACCTCTGAAGCGCTGGGTAACTGATGGACTTCTGGGACGAAGCGAAA  
ACCCTGATCAACTCTGACTACATCCCGAACTCTGGTGACCTGATCTTCGTTA  
ACAACCACCTGTGCGCGCACGGTCGTTCTGCGTTCATCGCGGGTCAGCGTA  
TCGAAAACGGTGAAATCATCAAATGCGAACGTCGTCAGATGCTGCGTATG  
ATGTCTAAACCTCTCTGATCCACATCCGTTCTGTTACCCGTACCGACGACC  
CGTACTTCATCATGGAAGAACACCTGGGTAAATCTTCGACCTGGACTAA

*FjohKDO*

ATGAAATCACAATCATTAATTGAAGATGAGATACCAGTAAAAGAAAAGTAT  
GCTTATCAAATTCCTACAAGCCCGCTGATAGTGGAGGTTACGCCTCAGGAA  
AGAAACATTTTGTCTAATGTGGGCGCTCTGCTGAAAAGGCATTTAAGAGC  
TATGAAAACCCAGATTATATAGAAGCGCTTCATCTGTATTCTTTTCAGCTTC  
TTCCAGAAAGAATAGCCAGAATTTTAAGCCGTTTTGGAACAGATTTCTCAG  
CTGATCAGTATGGCGCTATTATTTTTAGAGGTCTTCTTGAAAGTTGATCAGG  
ATCATCTGGGACCAACTCCTGCGAATTGGCAGAGCGCTGATTACTCAAAAC  
TCAATAAATACGGCTTTATTTGTTCTTGCTGCATGGTGCAGTTCCTTCAAA  
ACCAGTACAATATTATGCGCAGAGAAAGGGCGGGGGAATTCTTCATGCTG  
TTATTCCAGATGAGAAAATGGCAGCTACGCAAACAGGTTCCGGGATCAAAA  
ACAAATTTGTATGTTTCATACAGAAGATGCTTTTCTTTACATCAGGCTGATT  
TTTTAAGTTTTCTATATCTGCGAAATGAAGAAAGAGTTCCTTCTACACTTTA  
CTCAGTAAGGTCGCATGGTAAGGTGAATAAGATAATGGAAAAGCTTTTTG  
ATCCAATTTATCAATGTCCTAAAGATGCTAATTATCAGGAAGAAATTAATG  
ATGGTCCGCTGGCTTCTGTTTTATATGGAAATAAAAAGCTGCCTTTTATTAG  
ATTTGATGCAGCAGAGCAGATATTTAATGAAAACGCCGGACAGACTCCCG  
AAGCTCTTTACAATTTAACTGAATTTTGAATGAAGCTAAAGAGTTGATTA  
ATAGTGATTATATCCAGATTCTGGTGATGTTATATTTGTAAATAATCATTT  
GTGTGCTCACGGAAGAAGTGCTTTTACAGCAGGGCAGAAAGAGGAGAAT  
GGTAAGCTTGTGCCATGTGAGAGACGACAAATGTTAAGAATGATGAGCAA  
AACCAGTCTAATTCATATAAGATCAATGACACATACCGATGATCCGTATTTT  
GTTATGGAAGAACATTTAGGAAAAGTTTTTGATCAGGCTTAA

*PbraKDO*

ATGCAGCTGGGTGTGCCGTTTCTGAAGCGTGAGAGCATGAGCAAAATGAC  
CGGCCAAGAATGGGCGGCGGCGGCGCCGAGACCGAACCGGGTGATGTT  
CGTGCGGCGCTGCAGCAACGTGGCTGGGCGCGTTTTGACGCGACCGATAT  
GCAGGTGGCGGTTGACGAGGCGGCGGATCTGCAACGTCTGACCGAATAT  
GCGCGTAGCCTGCCGGTGGACCGTTTTGGTACCGGTGGCCGTACCGTAG  
CTATGCGGAGGGCATCCTGACCCCGCGTCGTAAGACCATTGCGTGGAAGG  
CGGGTGCGCGTACCCCGGATGGTCGTGTGGAAATCGCGTACGTTACGAC  
AGCGAGTTCCAACCGGAACACGGTGGCGTGGTTTCGTAACCTTTGCGCGTAC  
CCGTGAGGACATCCTGGCGCTGCCGCTGGTTACCGTCTGATTTGGTATGA  
TCTGAGCCTGACCCCGATGTTTCGACGCGGAAGGTGATCTGCTGTGCGGCTT  
TCACATGATTCGTATGCAGGCGACCCCGGGTGCGGTGGCGCGTATTACCC

CGGACTGCCTGCACCAGGATGGCCAACCGTTTACCGCGGTGCACCTGGTT  
GAGCGTAGCCACGCGGAAGGTGGCGTTAACTTCATCGCGCCGCCGCGTTA  
CACCGGTCGTCAATTTGATGAGGTGCCGAGCCACCTGCTGAGCGCGTTTCGT  
TCTGGGTAGCCCGCTGCAGAGCTATATCATTGACGATGCGGCGATTTGCCA  
CCAAGTTACCGCGGTTAGCTGCAGCCCGGGTGGGAGCCATGGTACCCGTA  
CCGTGATCCTGATTGATTTAGCCCGCTGAACCCGGCGAGCAGCGCGCAG  
CCGACCTGA

*PlumKDO*

ATGGGTTGGAACATTTTTACCAATGCACCGGATAGTTATCATCTGACCGCA  
GCACATATTCGTAATAGCCTGCATCAGCAGGGTTTTGCAACCTTTAATGCA  
GCAGATCTGGATCTGAGCGATAGCGAAAAAATTGATCTGATTAGCCTGTG  
CGAACTGAGCAAAAAGCCTGCCGCTGGATCGTTTTGGTGAAGGTGGTCGTC  
ATCGTAGCTATTGTGAAGGTATTTGGAGCTGGGAAACCGAAACCATTGATT  
GGAAAACCGGTTATCCGCAGCCGGATGGTAGCGTTGAAATTGATTATCATC  
AGGGTAGCGAATATCAGCCGGAATTTGGTGGTGTGTTTCGTAAATTTCTGC  
GCATGAGTGATGAGATTCTGAATAAAGGTCTGCTGAACAAACTGATCTGG  
CATGATCTGAGCCTGACCGGTATGGCAGAACATTATAGCCATCTGCTGTGT  
GGTGTTTCATCTGATTTCGTATGCAGGCACTGCCTGGTAAACCGGCAAAAATC  
ACCCGAATTGTTTTCATCGTGATGGTCAGCCGTTTACCGCAGTGATCTG  
ATTGAACGTTATAATGTGGAAGGTGGTGGCAGCCATATTGCACCGCCTAGC  
TATACCAATTGTCAGCTGGAAGCAGTTCCGGCACATGAAATTACCCGTTTT  
CTGCTGAATGATCCGCTGGATAGCTATATCATTGATGATGCAGCAATTTGC  
CACTATATTAACCCGGTGATTTGTGATGAAAATGCCAGCGTTGGTGTTTCGT  
ACCATTATTCTGATTGATTTTACACCGCTGGAACAGAGCGATCGTCGTCCG  
CAGTGA

*BspeKDO*

ATGCAGCAGCAAGGTTGGGCACGTTTTGATGCAGCAGATCTGGATCATGT  
TGAAGCAAAAAGCCATTGTCTGGCACAGCTGAGCCGTTATGCAGATCAGC  
TGCCGGTTGATCGTCATGGTGGTGCAGGTCGTCATCGTAGCTATGCAGAA  
GGTGTTCTGGCACCGAATGATGGTCATGTTGCATGGAAACCGGGTTTTGTT  
GGTCTGGATGGTGCAATTGAAATTGAATATCGCCAAGAAATTGGCTTCCAG  
CCGGAATATGGTGGTGTTCATCGTCGTTTTCTGCGTACCAGCGATAGCATT  
CTGGCACTGCCGCTGATTCGTAAACTGATTCGTTTTGATCTGGCCCTGACAC  
CGCTGGGTGAACTGGGCGAACCGCTGCTGTGTGGTCTGCATGTTCTGCGT  
ATGCGTGCACTGCCTGGTGTATGAGCCGTATTACACCGGATTGTCTGCAT  
CAGGATGGTCAGCCGTTTACCGCAGTTCATCTGATTGATCGTACCAGTGCA  
GTTGGTGGTGTGAACTATATTGCACCGCCTCAGTATGCCGGTCTGCAGGTT  
GATGATGTTCCGGATGAACAGGTTTCGTGCATTTAGCCTGCATGTGCCGCTG  
GAAAGCTATATCATTGATGATGCAGCCGTTAGCCATCATGTTACCAGCATT  
AGCTGTGCTCCGGGTGCACCGTGTGGTATGCGTACCGTTATTCTGATCGAT  
TTTACTCCGCTGGATGCAGTTGTTTCGTAGCCCGTCAGATGCAGCACGTCCG  
ATTGTTCCGACCAGCAATCCGGAACCGGTGCGTGATTGA

*BpseKDO*

ATGCATCGTATTGAAGAAGAACCGTTTAGCGCAGAAAGCCGTGCAGAACC  
GGATGCCGGTGCAGCACTGCGTGCAATTAGGTTGGATGATGTTTGGTATGG  
AAGATCTGCGTCTGTGTGCAGATGAACGTCGTGAACTGGCACAGCTGGCA  
CGTTATGCACAGACCCTGCCGATTGATGGTTTTGGTGGTAATGGTCGTCAT  
CGTTGTTATGCAGAAGCAGTTCTGAGCCCGAGCGCACGTACCCTGCGTTG

GAAACCGGGTATTGTTGGTAAAGATGGCACCATTGAAGTGGAATATGAAC  
AAGAAACCGAATTCCAGCCGGAATATGGTGGTGTTCGTCTGCTGTTTTGCCC  
GTGCAAGCGATCGTGTTCTGCAGAGCAGCCTGATTCGTAAACTGATTTGGT  
TTGATTTTGATCTGATTGGTTGGGCAGGCGCAAGCGAACCGCTGCAGTGT  
GGTTTTCATCTGGTTCGTCTGCAGGCACTGCCTGGTAAACCGAGCCGTAGC  
ACACCGGATTGTCTGCATCGTGATGGTCAGCCGTATACCGCAGTGCATCTG  
GTTAGCCGTCATGATGTTACCGGTGGTCTGAACTATATTGCACCGCCTCGT  
TATAGCGGTCGTAATGTTGATGAACTGCCTGCCGATGCACTGACCACCTTT  
AACTGACAGAACCGCTGGATAGCTATATCGTTGATGATGCAGCAGTTTGT  
CATCATGTTAGCGCAGTTGGTTGTGCACCGGGTGCAGCAAGCGGTAGCCG  
TACCGTTATGCTGATTGATTTTAGCCCGATTCCGCTGAGCAGCTGA

*BplaKDO*

ATGGATAATGTGAGCCAAGAAATTGTGGTTAGCCATGAAAGCCTGAGCAC  
CGATAATCTGGGTATTATTGGTATTCGTAATCGCCTGAGCGAATTAGGTTG  
GGCACGTTTTGATGCAGATGATTTTGCCTGACCGCACATGAACGTGATGA  
ACTGGATTTTCTGGCACGTTATGGTGAAAGTCTGCCGCTGGATCGTTTTGG  
TGGTGATGGTCGTCGTCGTGCATATTGTGAAGGTATTGTTGATCTGGCAAG  
CCGTCAGATTGCATGGCGTCCGGGTCATCGTGCCGAAGATGGTGGTATTG  
AAATTGAATATCAGCAGGATGAAATCTATCAGCCGGAATATGGTGGTGT  
GTGCGTCGTTTTCGTCGTCTGGGTAGCGAAGTTCTGGAAACCGGTCTGATT  
AATCGTCTGATTTGGCATGATCTGGATCTGACACCGCTGCCGGAACGTCAT  
GAAACCCTGCTGTGTGGTCTGCATATGATTTGTATGACCGCAATTGGCACC  
GAACCGGCACGTATTACACCGGATTGTCTGCATCGTGATGGTCAGCCGTAT  
ACCGCAGCACATCTGATTCGTCGTCATAATGCAAAAGGTGGCGTTAACTAT  
ATTGCACCGCCTCGTTTTAGCGGTTGGCGTGTGAAGCAGTTCCGGATGAT  
CAGCTGCAGGTTTTTACCCTGCATGAAGCACTGGATAGCTATGTGATTGAT  
GATGAAGCCGTTAGCCATCATGTTACCAGCGTTAGCTGTGATGATCCGGCA  
CTGCCTGGTATGCGTACCATTCTGCTGGTTGATTTTACACCGGTTAGCTGA

---



Table S3. Amino acid sequences

| Protein         | UniProtKB        | Amino acid sequence                                                                                                                                                                                                                                                                                                                                                                                                     |
|-----------------|------------------|-------------------------------------------------------------------------------------------------------------------------------------------------------------------------------------------------------------------------------------------------------------------------------------------------------------------------------------------------------------------------------------------------------------------------|
| <i>Caci</i> KDO | C7QJ42           | MKNLSAYEVYESPKTSGESRTEAVSEAAFESDPEVSAILVLTSSSEAS<br>TLERVADLVTAHALYAAHDFCAQAQLAAAELPSRVVARLQEFA<br>WGDMNEGHLIKGLPQVRSLPPTPTSNVHAVAATTPMSRYQAL<br>INECVGRMIAIEAEGHGHFTFQDMVPSAMSAHSQTSLSGSAVELE<br>LHTEQAFSPLRPDFVSLACLRGDPRALTYLFSARQLVATLTQTQIEIA<br>MLREPMWTTTVDSEFLAEGRTFLLGFERGPILSGADDDPFIVF<br>DQDLMRGISAPAEQLQQTIVIRAYYAERVSHCLAPGEMLLIDNRR<br>AVHGRSIFAPRFDGADRFLSRFIVADGSRSRHARSSFGRVVSAR<br>FS                |
| <i>Krad</i> KDO | A6WF32           | MSSLFLDSSAHVPTLFELPAPQRAALAALGARLTADPVTEPDAFG<br>RQARLLARELSVEVTEALWAFEERGSDSGVLVLRGLLEVGEPPPT<br>ADNTGGIGGRTLLARQQAIVSHALGHMVGYYAAEGHGHLLQDM<br>VPNARLAATQQSQGSRVELEAHEQCFSDLRPDYVVLGCLRGDA<br>DAATYAFRALDLLAHVDPTDVMELFRPLWTTLVDESFAFDLDR<br>EVRGPFSILSGDVDDPTMLVDQDLMHGITKHAQALLERVLEIYVA<br>HRHAVVLQPGDVLLLDNLRAMHGRSPFAPRFDGTDRFISRGFVV<br>RDLRRSRFARPGGNRVVQASFS                                                  |
| <i>Krhi</i> KDO | A0A2T0R1Q3       | MSSVFLDSSAVVPTVRELATEERSALAALGSRVSADPVTDPDAFG<br>RQARLLARELPQGLAETLWAFEERGSDSGVLVLRGLDVGDLPPPT<br>PPDNTGGVGGRTLLARQQAVVSHALGHMVGYYAAEGHGHLLQD<br>MVPNAKLAATQQSQGSRVELEAHEQCFSALRPDYVVLGCLRG<br>DADAATYAFRALDLLGHVDPTVMELEFRPLWTTLVDESFAFDLDR<br>TREVRGPFSILSGEIDDPTMLIDQDLMHGITKRAQALLERVLEIYV<br>AHRHAVVLQPGDVLLLDNLRAMHGRSPFTPRFDGTDRFISRGFV<br>VRDLRRSRFARPGGGRVVQASFS                                               |
| <i>Mint</i> KDO | A0A1X1X0H1_9MYCO | MLTIDPLRDPQGYVRQARLLSAQLPWALRETVVDFETYGDGGLL<br>VTGLEVGSAATPDSPANDVTHNTPIAAASALLACIANLVGYRA<br>ESWGRICQSVIPTKGDASQQKSTGSRVCLECHTEQAFNLLTRPDY<br>VALGCLRGDPAATFMLSARALQEHLPSVVGLLREPMFNTRID<br>QSFIEGGVPDEVRGPIPVLSGALEDPVITFDEDLMWGNPKHQ<br>ALEMVKTWADHRSSVVLKRGDVLIDNSRAIHGRSAFRPRWD<br>GGDRWLCRLQGVCDLTRTRDARRPQSPVIEIRGC                                                                                             |
| <i>Cpin</i> KDO | C7PLM6           | MRPLDVTPTISPGAQDLPRTMHFAAEPPLQPLIIDITEEEKLEITYI<br>GKKLKRKYKSYDDPGFISMLHLNAYTLLPERIAKVLSNFGTDFSDQ<br>QYGAVVLRLGIEIGQDELGPTPRSWQETDHEKIMEYGFISLLHG<br>AVPSKPVEYFAQRKGGGLMHAIIPDENMSFTQTGSGSRTDLFVH<br>TEDAFLHNAADFLSFLRNEERVSTLYSIRSHGRPDAILQELFKPI<br>YKCPKDANYASEEALGDDIRTSVLYGSRSAFPMRFDAAEQIYNED<br>ANQDPEALHNLKRFWEARKLIYNDFVPESGDLIFVNNHLCAHG<br>RNAFLAGFREENGQLVKCERRMLRMMSKTSLINIREVTHPENP<br>YLIMEEHYGVYSAHLANL |

|                 |                  |                                                                                                                                                                                                                                                                                                                                                                                                                    |
|-----------------|------------------|--------------------------------------------------------------------------------------------------------------------------------------------------------------------------------------------------------------------------------------------------------------------------------------------------------------------------------------------------------------------------------------------------------------------|
| <i>Nkor</i> KDO | G8T8D0           | METIIESRQRINSPGVLPPPLSPLIVDVTPKERASISNVANILLKAFG<br>HYEHPDFISALHLNAFQLLPERIAGILSRFGTDFSRHQYGALVFRG<br>LTEVDQEALGPTPPSWKETDYSKLVKYGFICSLHGAIPSKPVQYY<br>AQRKGGGLLHAVIPDEKMSHTQTGSGSRTDLFVHTEDAFLEFNQA<br>DFLSFLFLRNEEQVPSTLYSIRSHGDTNAIMAELFKPIYKCPKDANY<br>ADDENAGEEVTTSILYGNRERPFIRFDAAEQIYNEKAGQTPEAM<br>HNLVRFWDEAKQLIYNDFVPDSGDLIFVNNHLCAHGRNSFVAGY<br>RNENGQLVKCERRMLRMMSKTSLINIQSVTQLNDPYFIMEEHY<br>GKLFHSQQ |
| <i>Fspe</i> KDO | J3BZS6           | MSVERSAETSLTLEIPTSPLIKITQQERNILSNVGNLLVKAFGNYE<br>NPDYIASLHLHAFQLLPERITRILSQFGSDFSAEQYGAIVFQGLIEV<br>DQDDLGPPTPNWQGADYGKLNKYGFICSLHGAVPSKPVQYYA<br>QRKGGGLLHAVIPDEKMAATQTGSGSKTDLFVHTEDAFLEFNQA<br>DFLSFLYLRNEERVSTLYSIRSHGKMNPVMKKLFEPYQCPKDAN<br>YNDEDVANSOPTASVLYGNRELPFIRFDAAEQIFNENAGQTSEAL<br>GNLMDFWDEAKTLINSYIPNSGDLIFVNNHLCAHGRSAFIAGQ<br>RIENGEIICERRQMLRMMSKTSLIHIRSVTRTDDPYFIMEEHLGK<br>IFDL           |
| <i>Fjoh</i> KDO | A5FF23           | MKSQSLIEDEIPVKENYAYQIPTSPLIVEVTPQERNILSNVGALLEK<br>AFKSYENPDYIEALHLYSFQLLPERIARILSRFGTDFSAEQYGAIIFR<br>GLLEVDQDHLGPTPANWQSADYSKLNKYGFICSLHGAVPSKPV<br>QYYAQRKGGGILHAVIPDEKMAATQTGSGSKTNLYVHTEDAFLL<br>HQADFLSFLYLRNEERVSTLYSVRSHGKVNKIMEKLFDPYQCPK<br>DANYQEEINDGPLASVLYGNKKLPFIRFDAAEQIFNENAGQTPEA<br>LYNLTEFWNEAKELINSYIPDSGDVIFVNNHLCAHGRSAFTAGQ<br>KEENGKLVPCERRQMLRMMSKTSLIHIRSMTHTDDPYFVMEEH<br>LGKVFDDQA    |
| <i>Pbra</i> KDO | A8KCI8           | MQLGVPFLKRESMSKMTGQEWAAAAPETEPGDVRAALQQRG<br>WARFDATDMQVAVDEAADLQRLTEYARSLPVDRFGTGGRHRS<br>YAEGILTPRRKTIAWKAGARTPDGRVEIAYVQHSEFQPEHGGVV<br>RNFARTREDILALPLVHRLIWDLSLTPMFDAEGDLLCGFHMIRM<br>QATPGAVARITPDCLHQDGPFTAVHLVERSHAEGGVNFIAPPR<br>YTGRQFDEVPSHLLSAFVLGSPQLQSYIIDDAICHQVTAVSCSPGA<br>SHGTRTVILIDFSPLNPASSAQPT                                                                                               |
| <i>Plum</i> KDO | A0A022PMX0_PHOLU | MGWNIFTNAPDSYHLTAAHIRNSLHQGFATFNAADLDLSDSE<br>KIDLISLCELSKSLPLDRFGEGGRHRSYCEGIWSWETETIDWKTGY<br>PQPDGSVEIDYHQGSEYQPEFGGVVRKFLRMSDEILNKGLLNKLI<br>WHDLSLTGMAEHYSHLLCGVHLIRMQALPGKPAKITPNCFHRD<br>GQPFTAVHLIERYNVEGGATHIAPPSYTNCLEAVPAHEITRFLN<br>DPLDSYIIDDAICHYINPVICDENASVGVRTIILIDFTPLEQSDRRP<br>Q                                                                                                               |
| <i>Bspe</i> KDO | A0A1B4SJJ6       | MQQQGWARFDAADLDHVEAKSHCLAQLSRYADQLPVDRHGG<br>AGRHRSYAEGLVAPNDGHVAWKPGFVGLDGAIEIYRQEIGFQP<br>EYGGVHRRFLRTSDSILALPLIRKLIRFDLALPLGELGEPLLCGLHV<br>LRMRALPGVMSRITPDCLHQDGPFTAVHLIDRTSAVGGVNYIA<br>PPQYAGRQVDDVPDEQVRAFSLVPLESYIIDDAVSHHVTSISC<br>APGAPCGMRTVILIDFTPLDAVVRSPSDAARPIVPTSNPPEVRD                                                                                                                          |

|                 |            |                                                                                                                                                                                                                                                                                                    |
|-----------------|------------|----------------------------------------------------------------------------------------------------------------------------------------------------------------------------------------------------------------------------------------------------------------------------------------------------|
| <i>Bpse</i> KDO | Q63KU4     | MHRIEEEPFSAESRAEPDAGAALRALGWMMFGMEDLRLCADE<br>RRELAQLARYAQTLPIDGFGGNGRHRCYAEAVLSPSARTLRWKP<br>GIVGKDG TIEVEYEQETEFQPEYGGVRRRFARASDRVLQSSLIRKLI<br>WFD FDLIGWAGASEPLQCGFHLVRLQALPGKPSRSTPDCLHRDG<br>QPYTAVHLVSRHDVTGGLNYIAPPRYSGRNVDEL PADALTTFTLT<br>EPLDSYIVDDAAVCHHVSAVGCAPGAASGSRTVMLIDFSPIPLSS |
| <i>Bpla</i> KDO | A0A0B6S2H0 | MDNVSQEIVVSHESLSTDNLGIIGIRNRLSELGWARFDADDFALT<br>AHERDELDFLARYGESLPLDRFGGDGRRRAYCEGIVDLASRQIAW<br>RPGHRAEDGGIEIYQQDEIYQPEYGGVRRFRRLGSEVLETGLIN<br>RLIWHDLDLTPLPERHETLLCGLHMICMTAIGTEPARITPDCLHRD<br>GQPYTAAHLIRRHNAKGGVNYIAPPRFSGWRVEAVPDDQLQVF<br>TLHEALDSYVIDDEAVSHHVTSVSCDDPALPGMRTILLVDFTPV    |

---

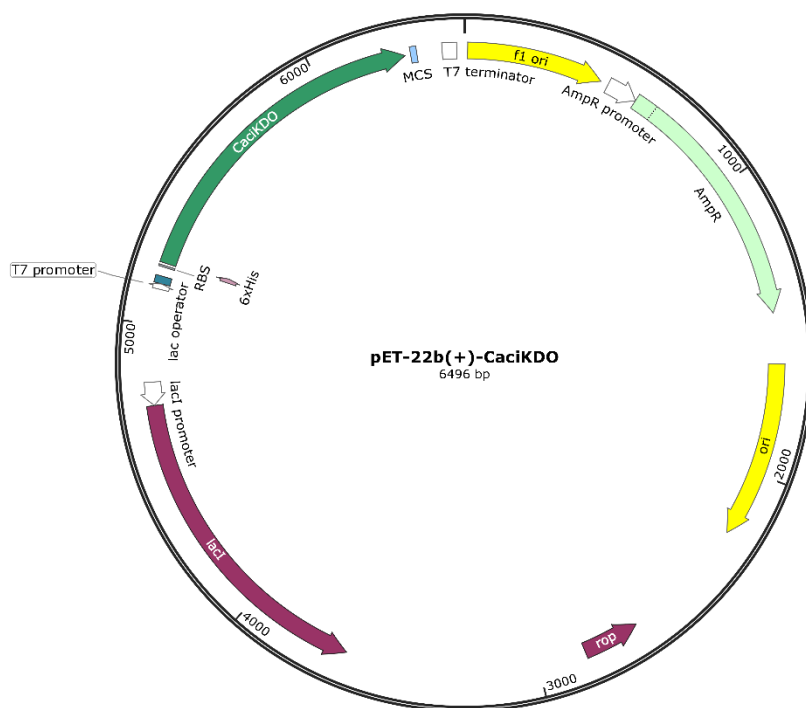

Figure S 1 Exemplary plasmid map of pET-22b(+)-CaciKDO

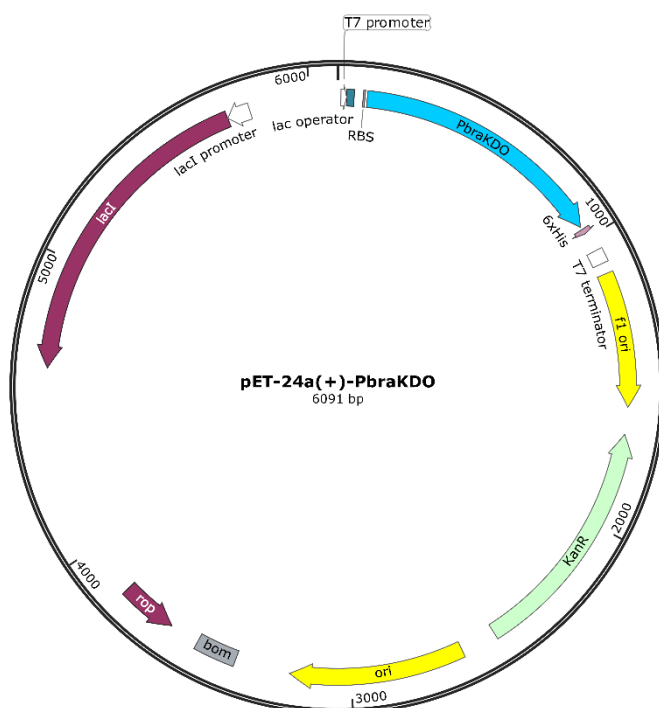

Figure S 2 Exemplary plasmid map of pET-24a(+)-PbraKDO

## Results

SDS-PAGE gel images of cell-free synthesized KDOs. Reference – CFPS without chaperones, -DNA – CFPS mix without plasmid template

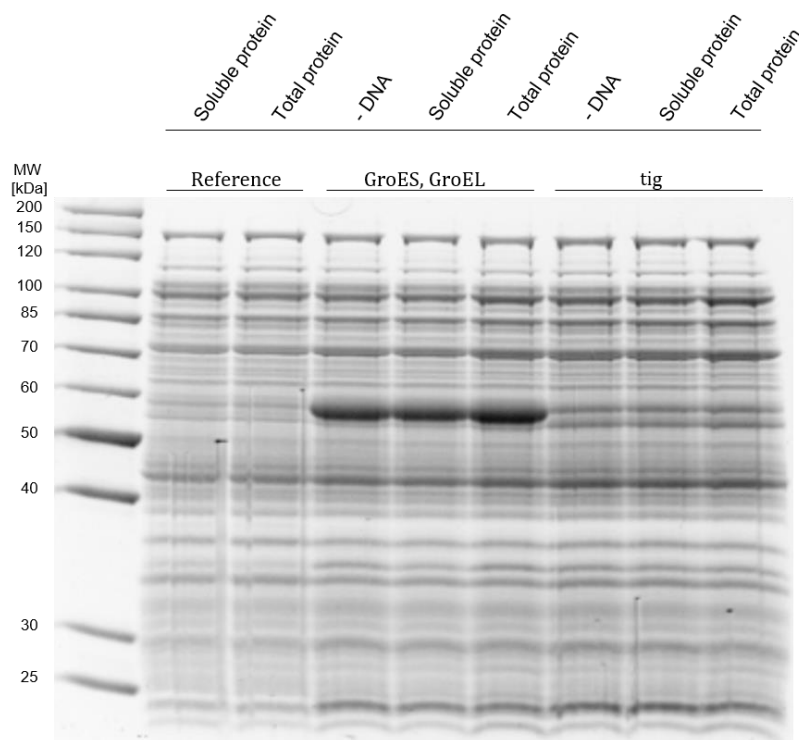

Figure S 3 Blan-KDO (31.5 kDa) + Chaperones (GroES, GroEL; tig)

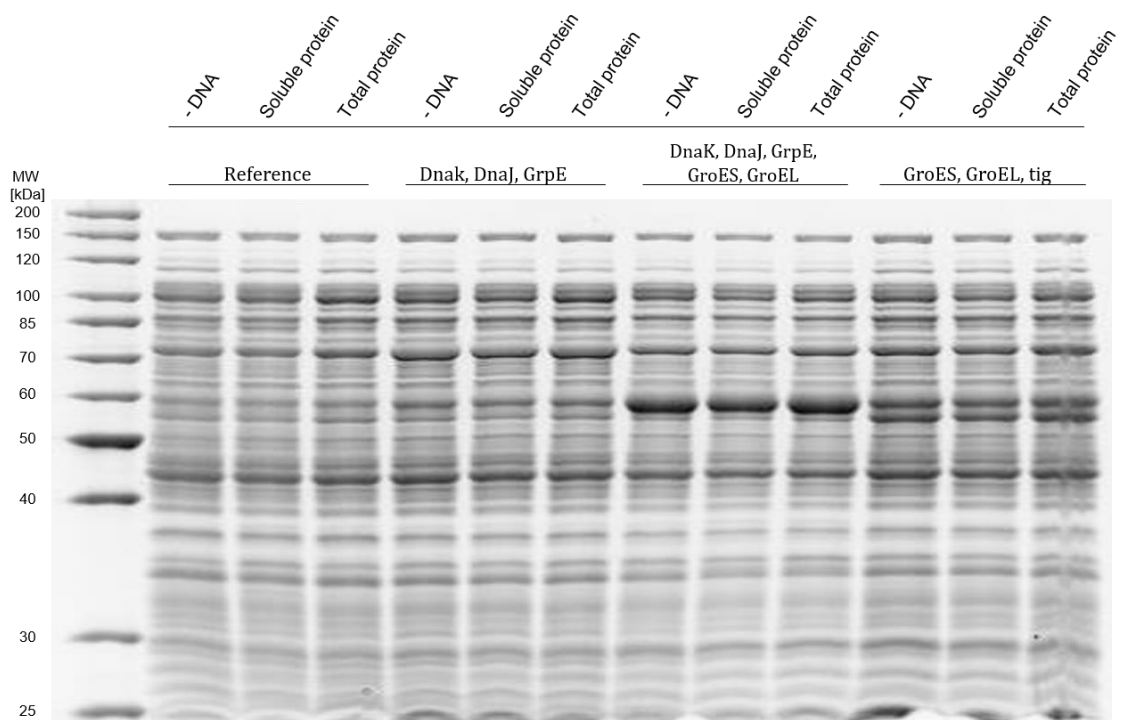

Figure S 4 Blan-KDO (31.5 kDa) + Chaperones (DnaK, DnaJ, GrpE; DnaK, DnaJ, GrpE, GroES, GroEL; GroES, GroEL, tig)

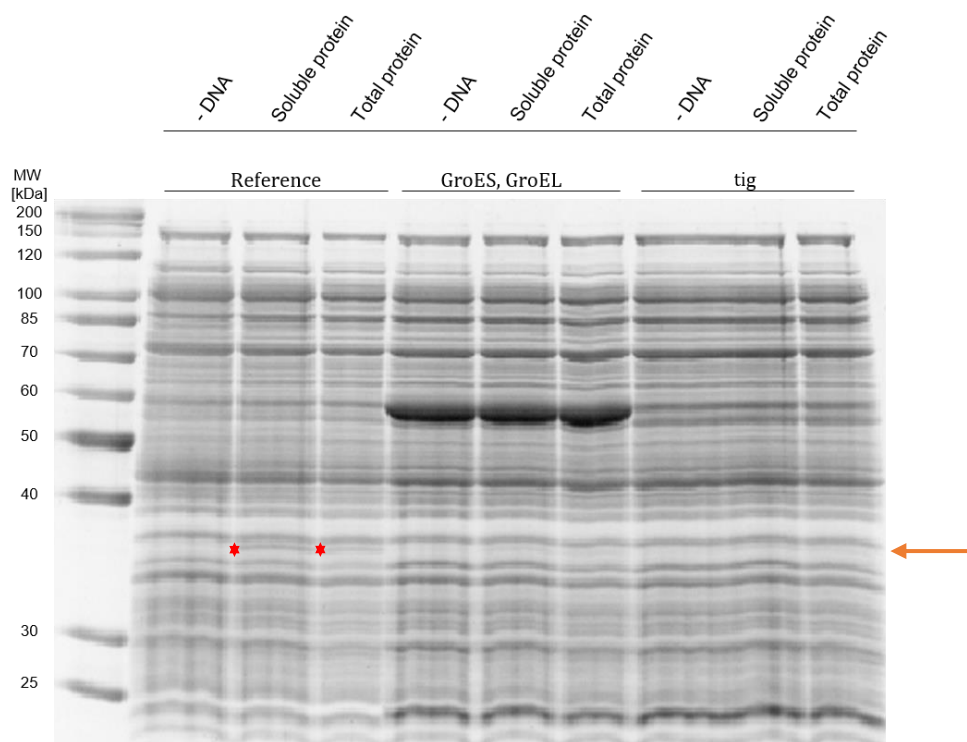

Figure S 5 Bpse-KDO (30.5 kDa) + Chaperones (GroES, GroEL; tig)

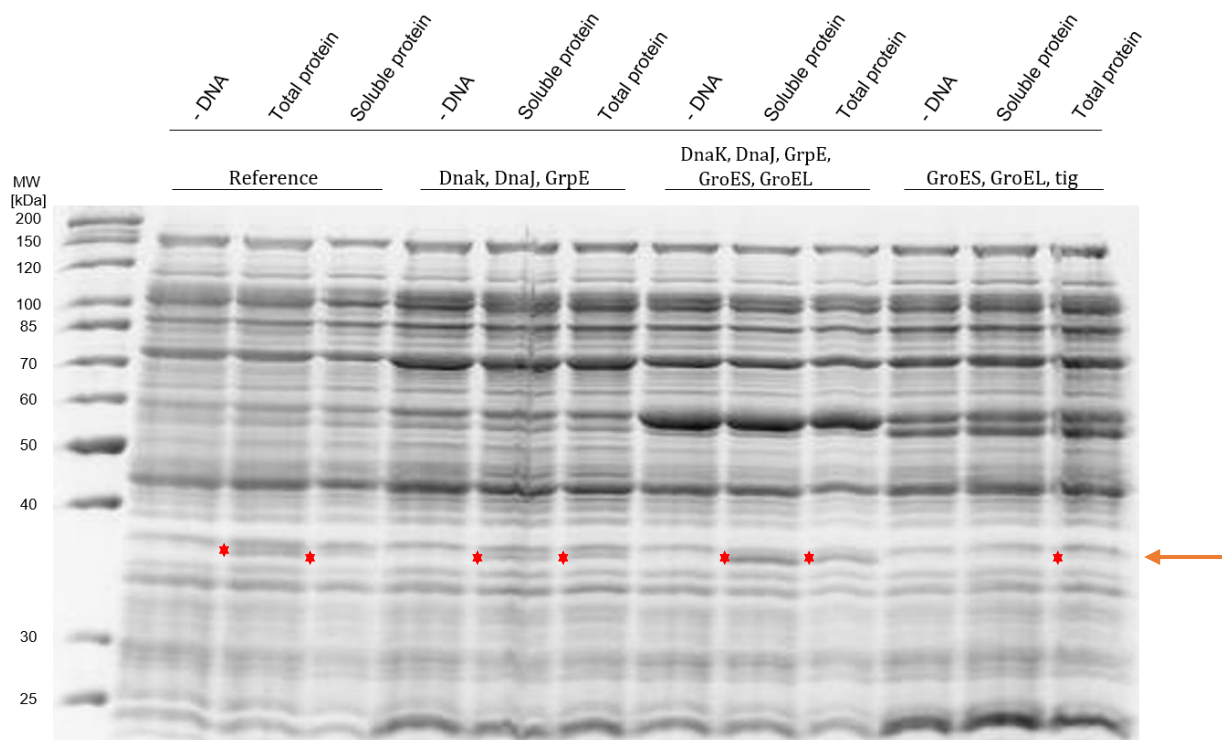

Figure S 6 Bpse-KDO (30.5 kDa) + Chaperones (DnaK, DnaJ, GrpE; DnaK, DnaJ, GrpE, GroES, GroEL; GroES, GroEL, tig)

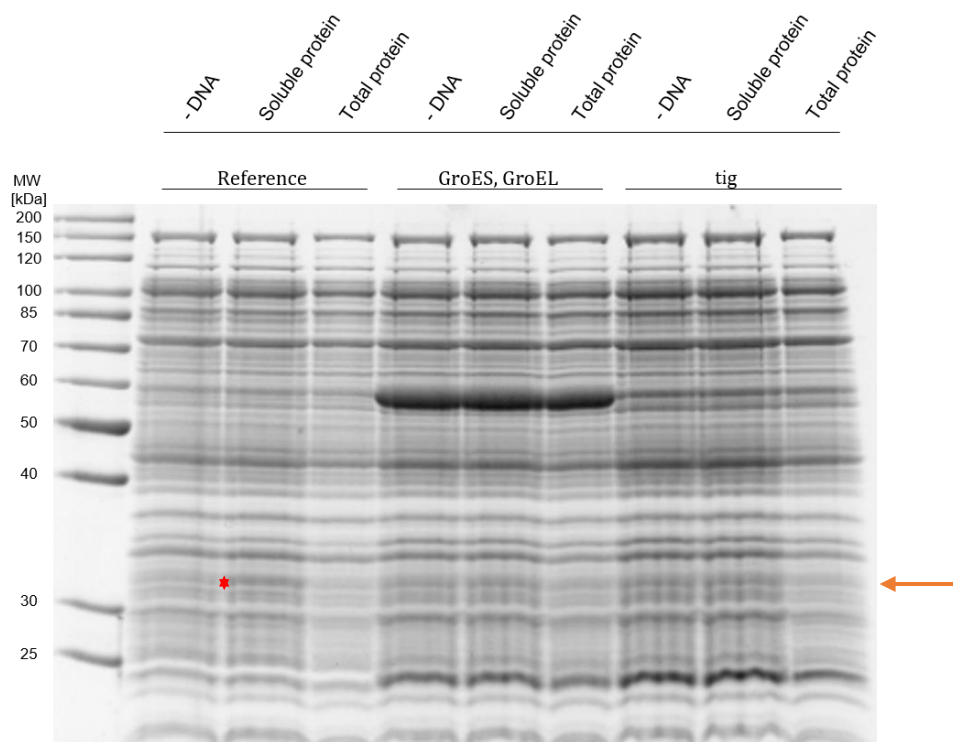

Figure S 7 Bspe-KDO (30.2 kDa) + Chaperones (GroES, GroEL; tig)

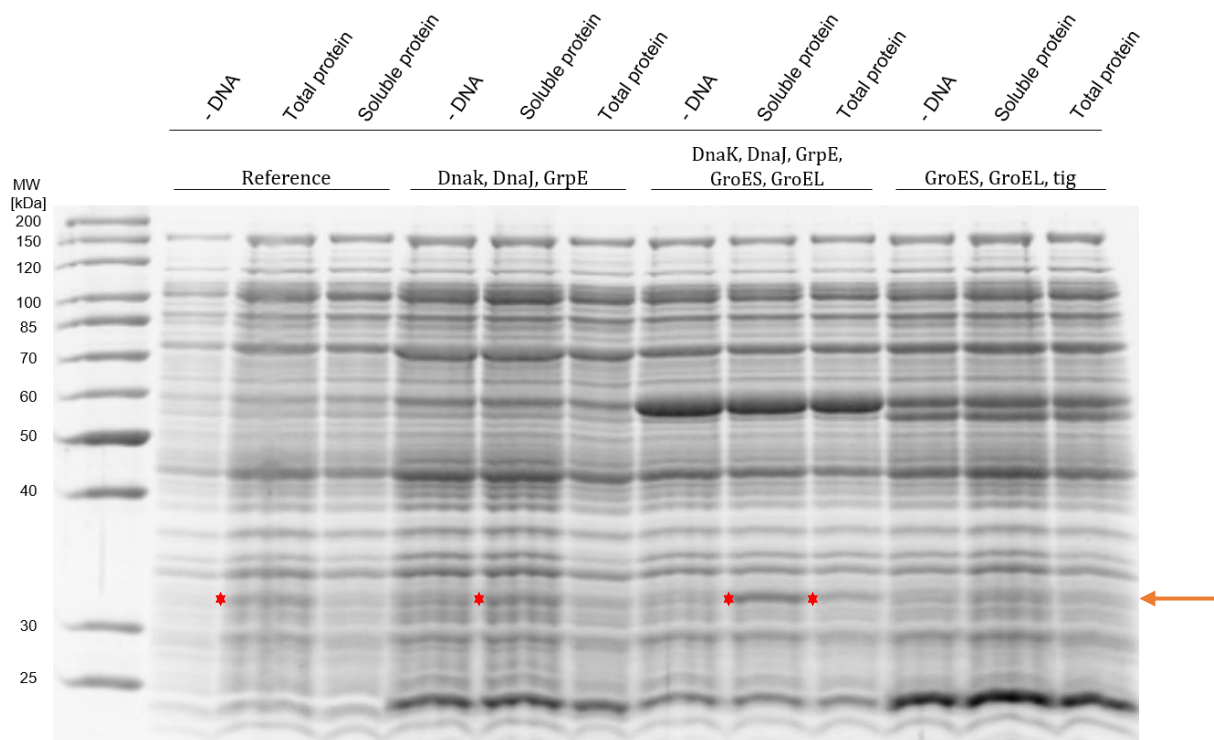

Figure S 8 Bspe-KDO (30.2 kDa) + Chaperones (DnaK, DnaJ, GrpE; DnaK, DnaJ, GrpE, GroES, GroEL; GroES, GroEL, tig)

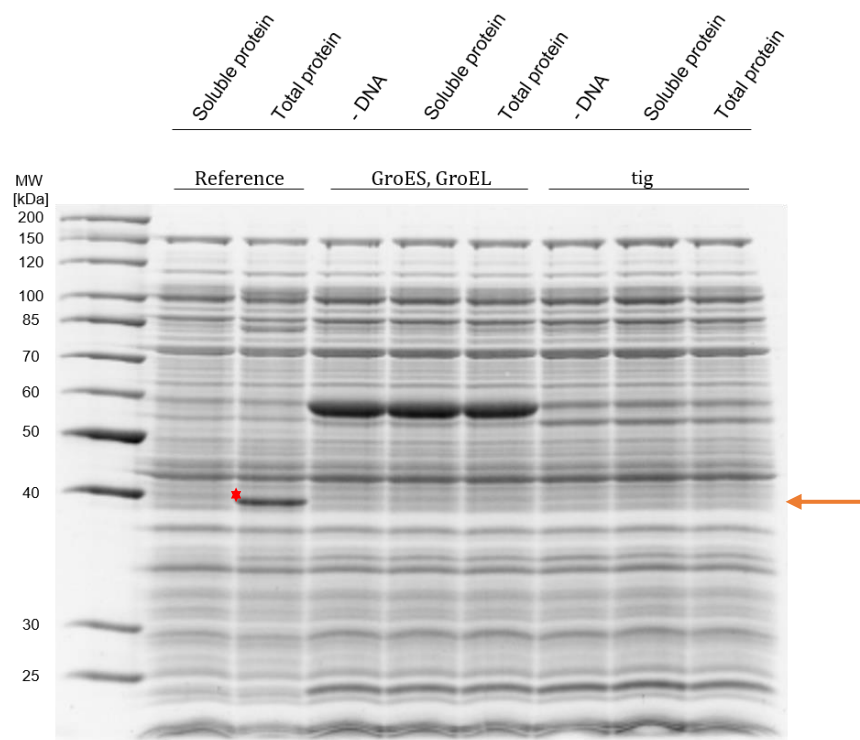

Figure S 9 Caci-KDO (40.0 kDa) + Chaperones (GroES, GroEL; tig)

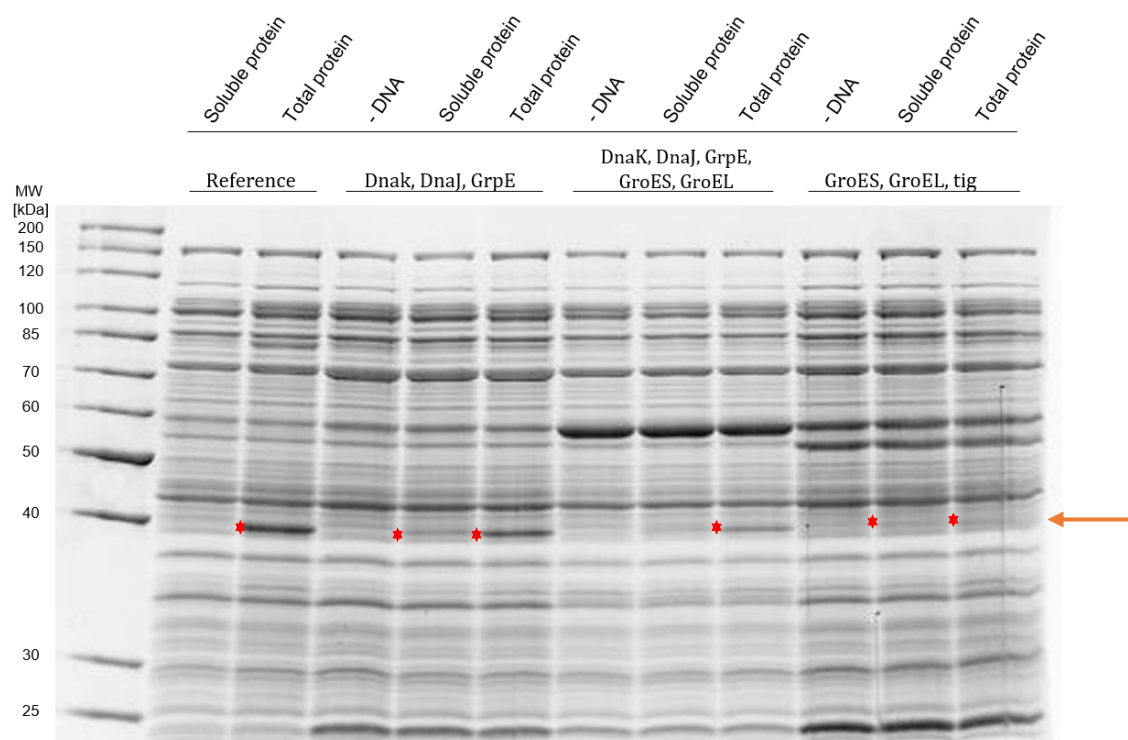

Figure S 10 Caci-KDO (40.0 kDa) + Chaperones (DnaK, DnaJ, GrpE; DnaK, DnaJ, GrpE, GroES, GroEL; GroES, GroEL, tig)



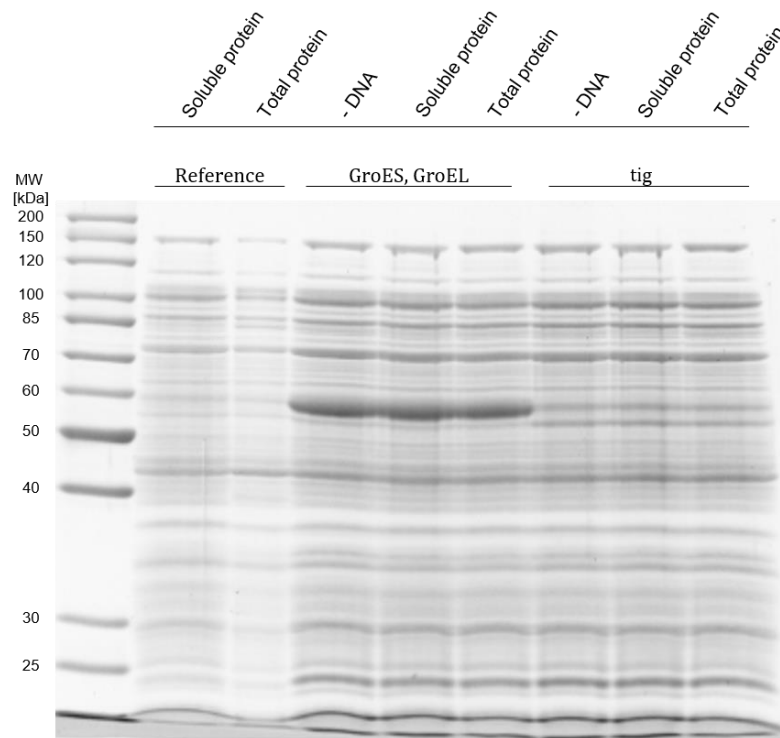

Figure S 11 Cpin-KDO (44.4 kDa) + Chaperones (GroES, GroEL; tig)

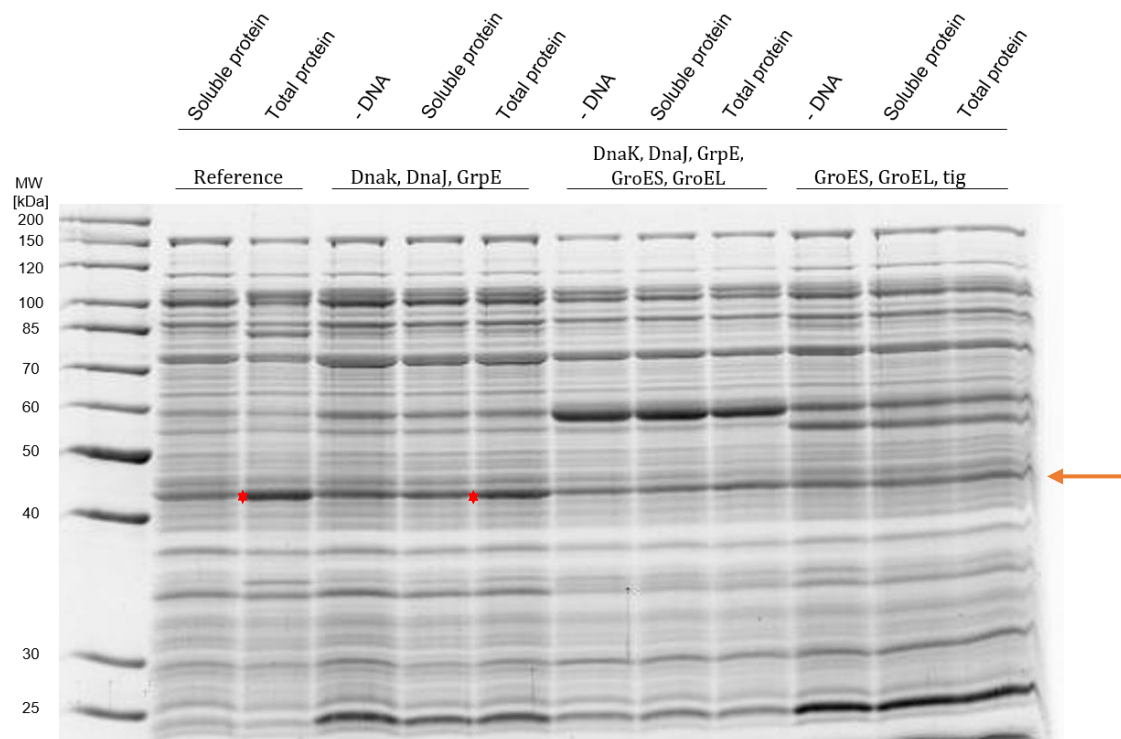

Figure S 12 Cpin-KDO (44.4 kDa) + Chaperones (DnaK, DnaJ, GrpE; DnaK, DnaJ, GrpE, GroES, GroEL; GroES, GroEL, tig)

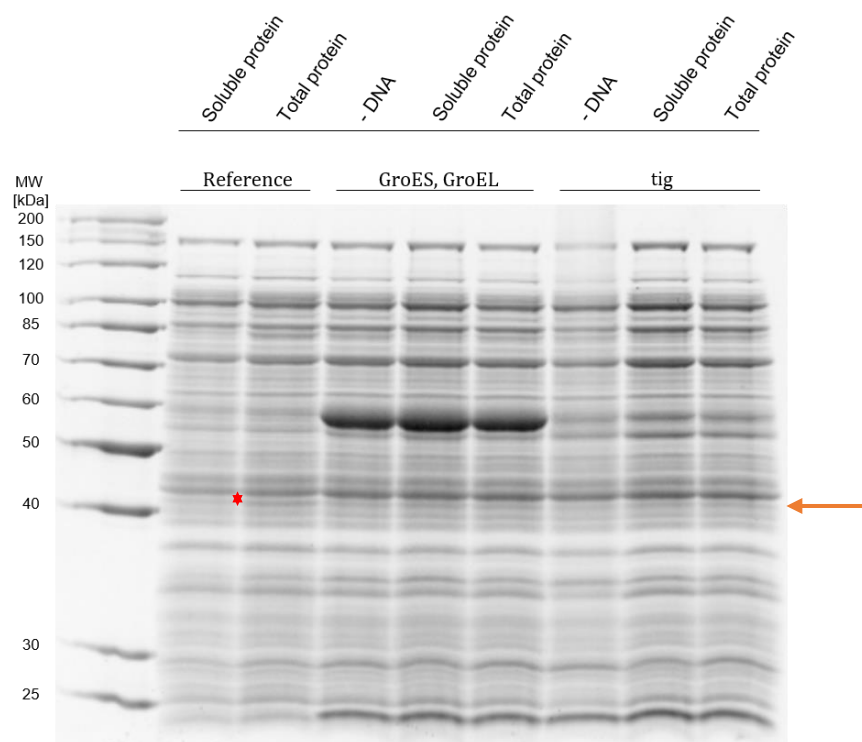

Figure S 13 Fjoh-KDO (42.8 kDa) + Chaperones (GroES, GroEL; tig)

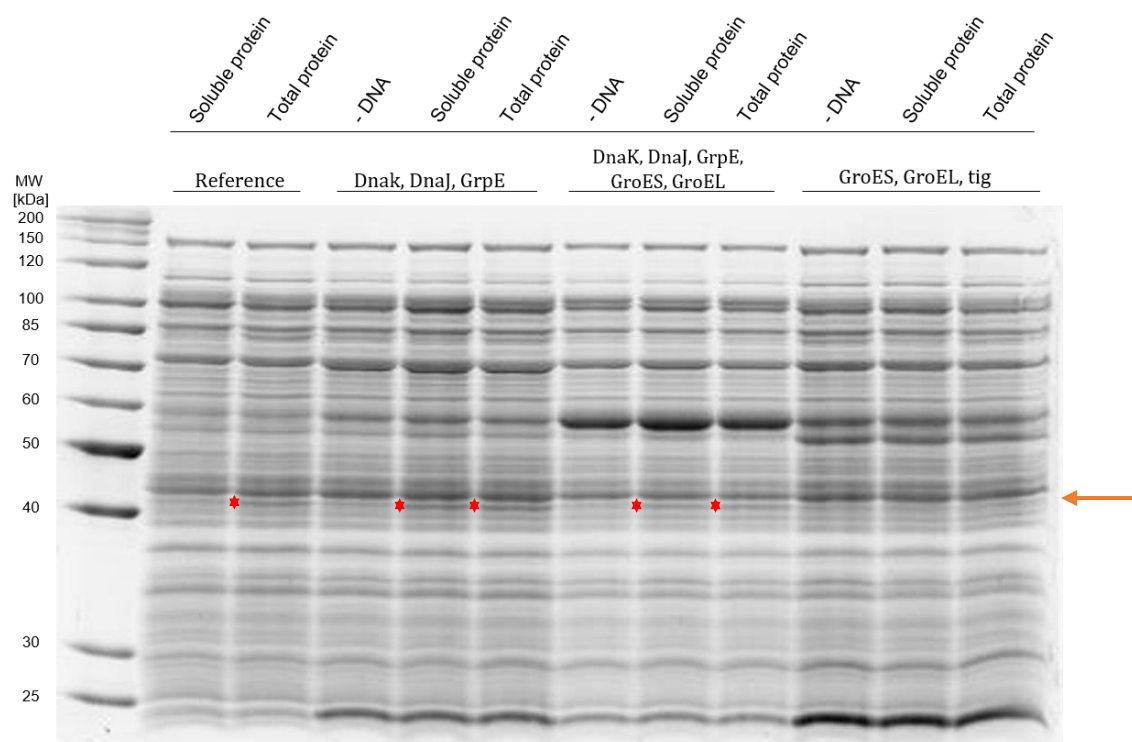

Figure S 14 Fjoh-KDO (42.8 kDa) + Chaperones (DnaK, DnaJ, GrpE; DnaK, DnaJ, GrpE, GroES, GroEL; GroES, GroEL, tig)

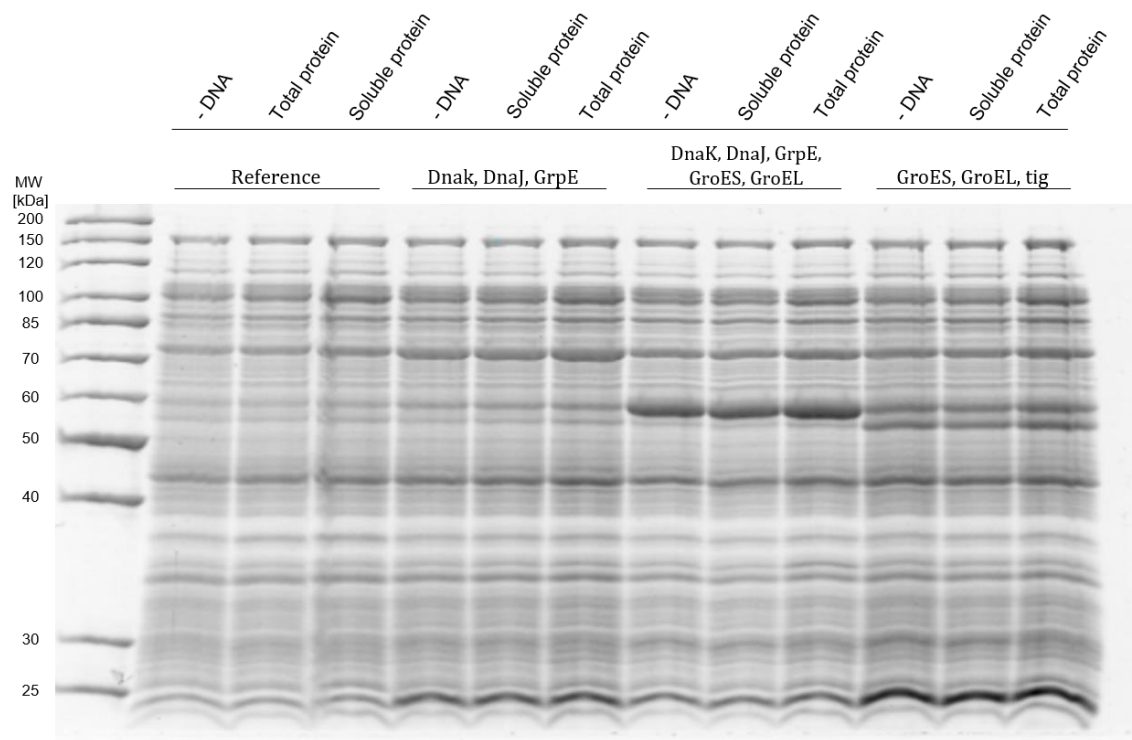

Figure S 15 *Fspe*-KDO (41.9 kDa) + Chaperones (*DnaK*, *DnaJ*, *GrpE*; *DnaK*, *DnaJ*, *GrpE*, *GroES*, *GroEL*; *GroES*, *GroEL*, *tig*)

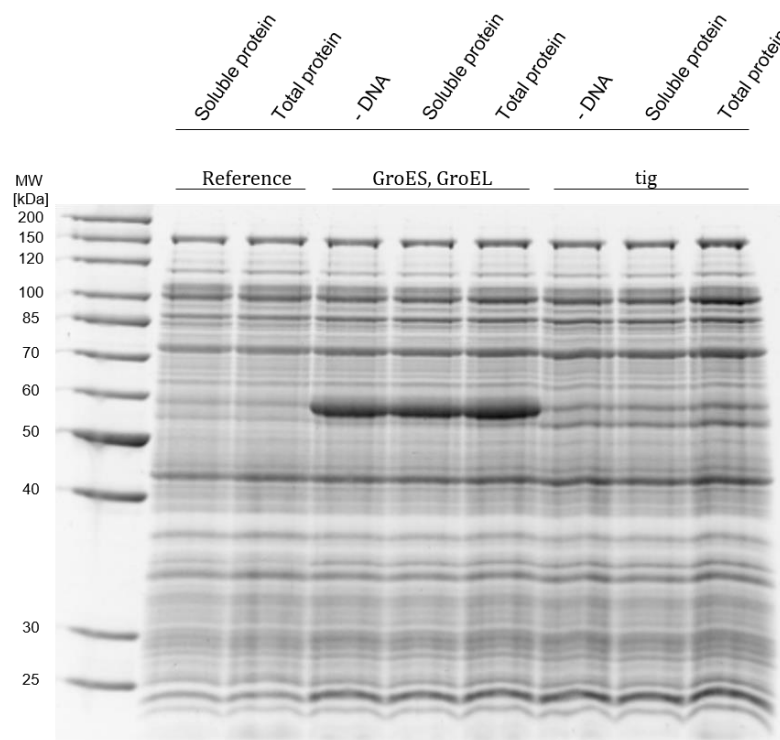

Figure S 16 *Fspe*-KDO (41.9 kDa) + Chaperones (*GroES*, *GroEL*; *tig*)

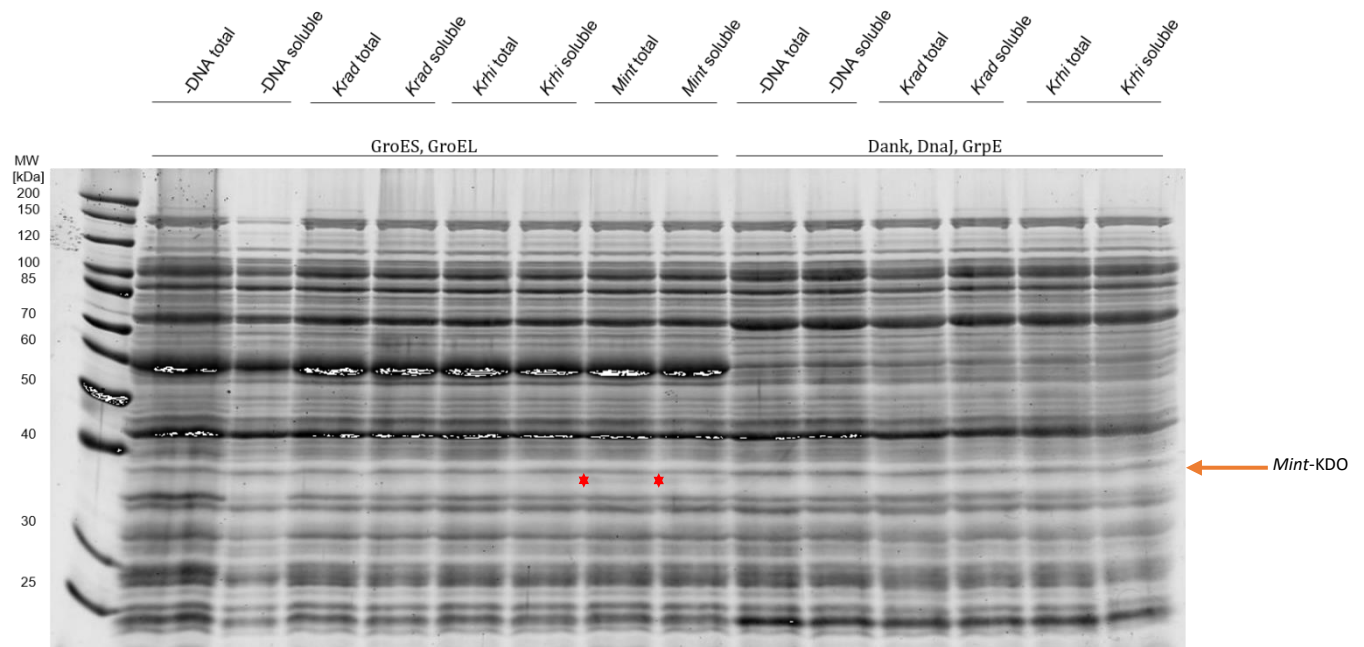

Figure S 17 Krad-(37.3 kDa), Krhi-(37.2 kDa), Mint-KDO (40.1 kDa) + Chaperones (DnaK, DnaJ, GrpE; GroES, GroEL)

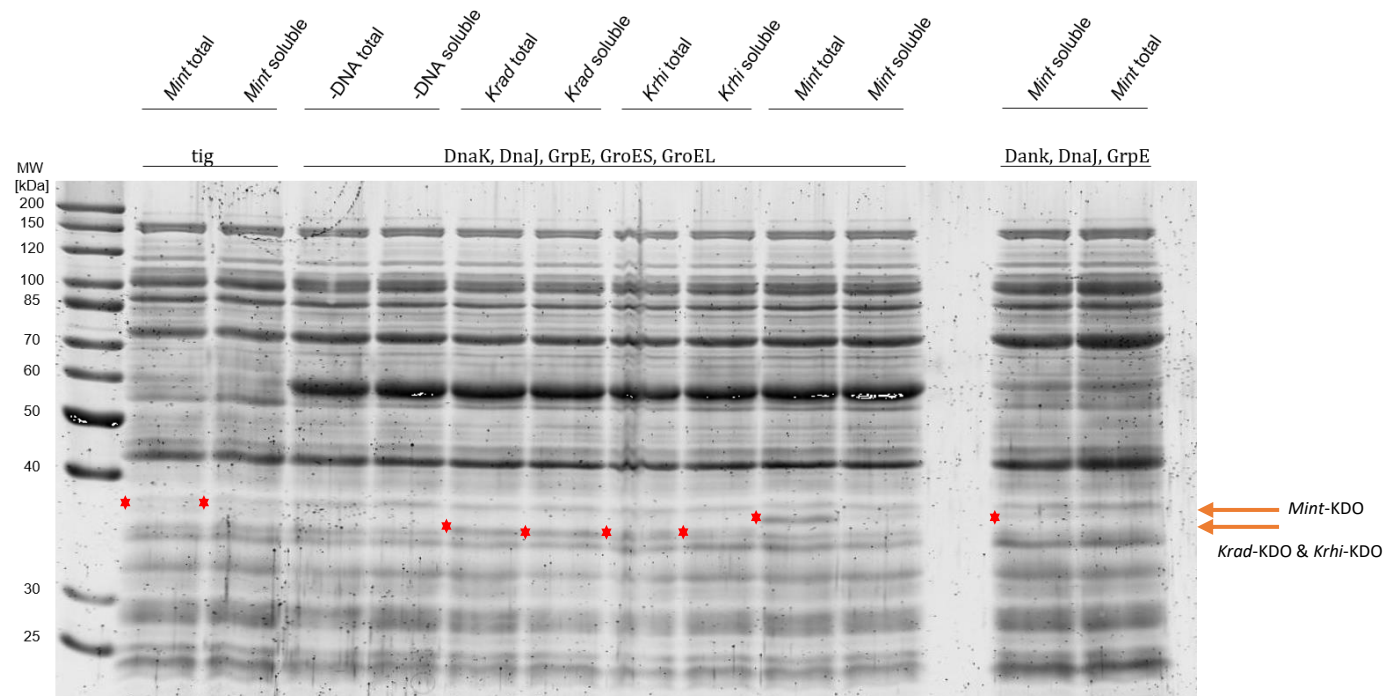

Figure S 18 Krad-(37.3 kDa), Krhi-(37.2 kDa), Mint-KDO (40.1 kDa) + Chaperones (DnaK, DnaJ, GrpE, GroES, GroEL; DnaK, DnaJ, GrpE)

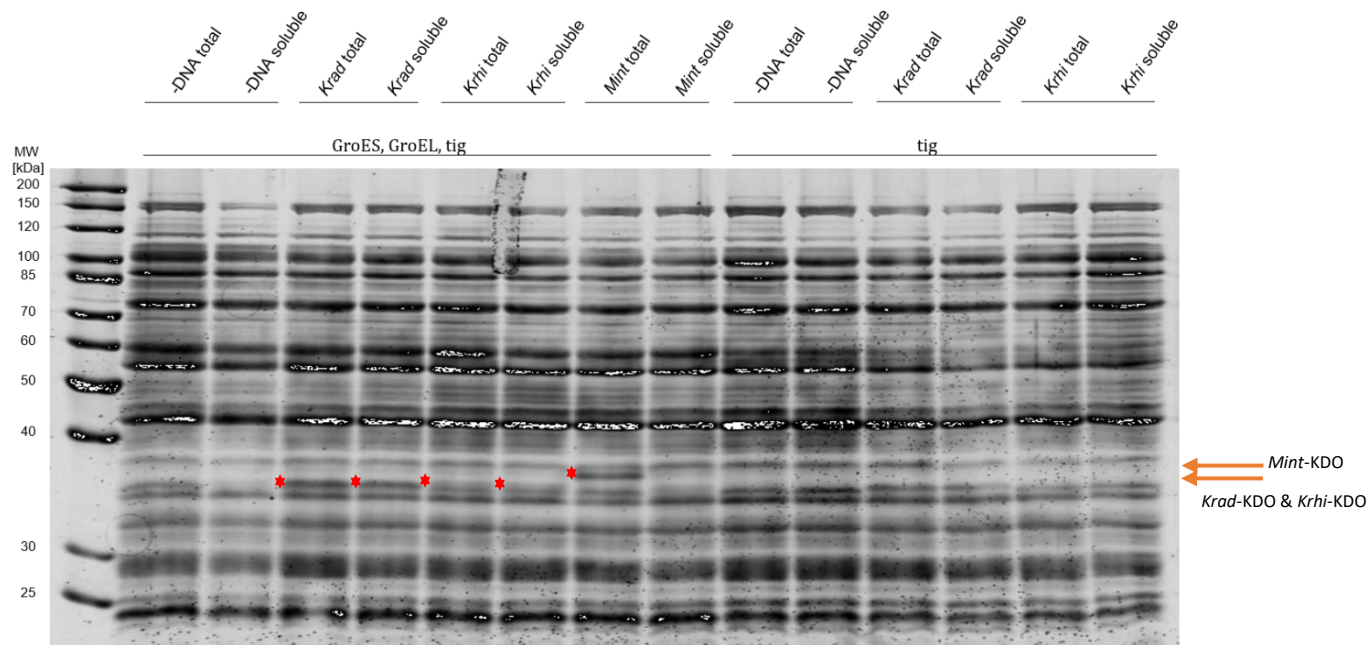

Figure S 19 Krad-(37.3 kDa), Krhi-(37.2 kDa), Mint-KDO (40.1 kDa) + Chaperones (GroES, GroEL, tig; tig)

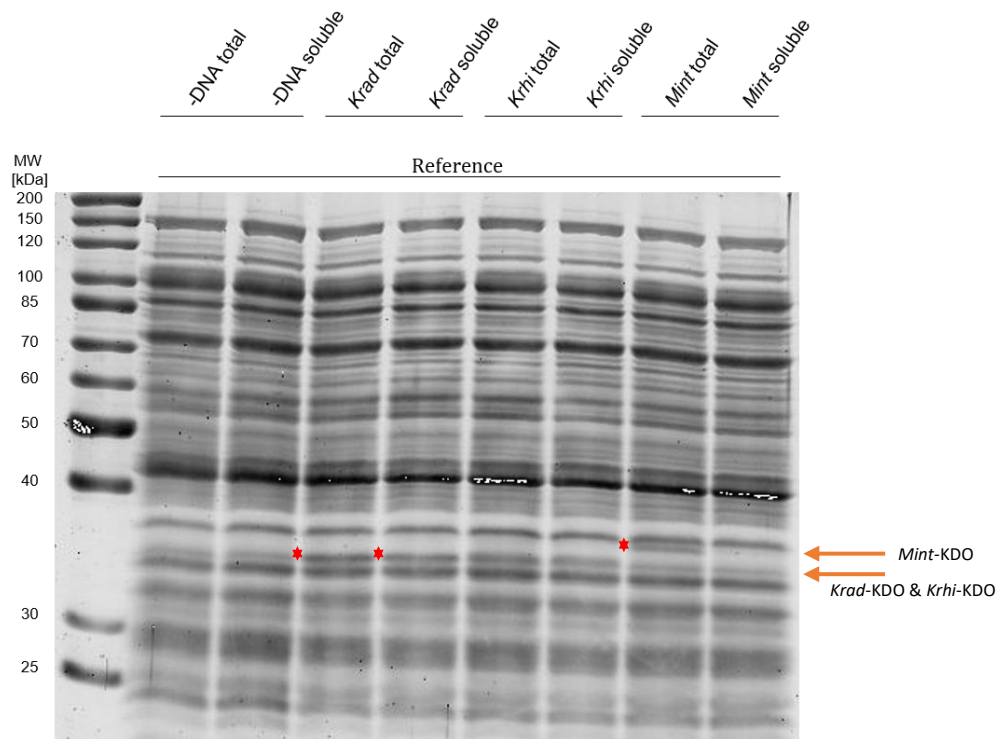

Figure S 20 Krad-(37.3 kDa), Krhi-(37.2 kDa), Mint-KDO (40.1 kDa) without chaperones



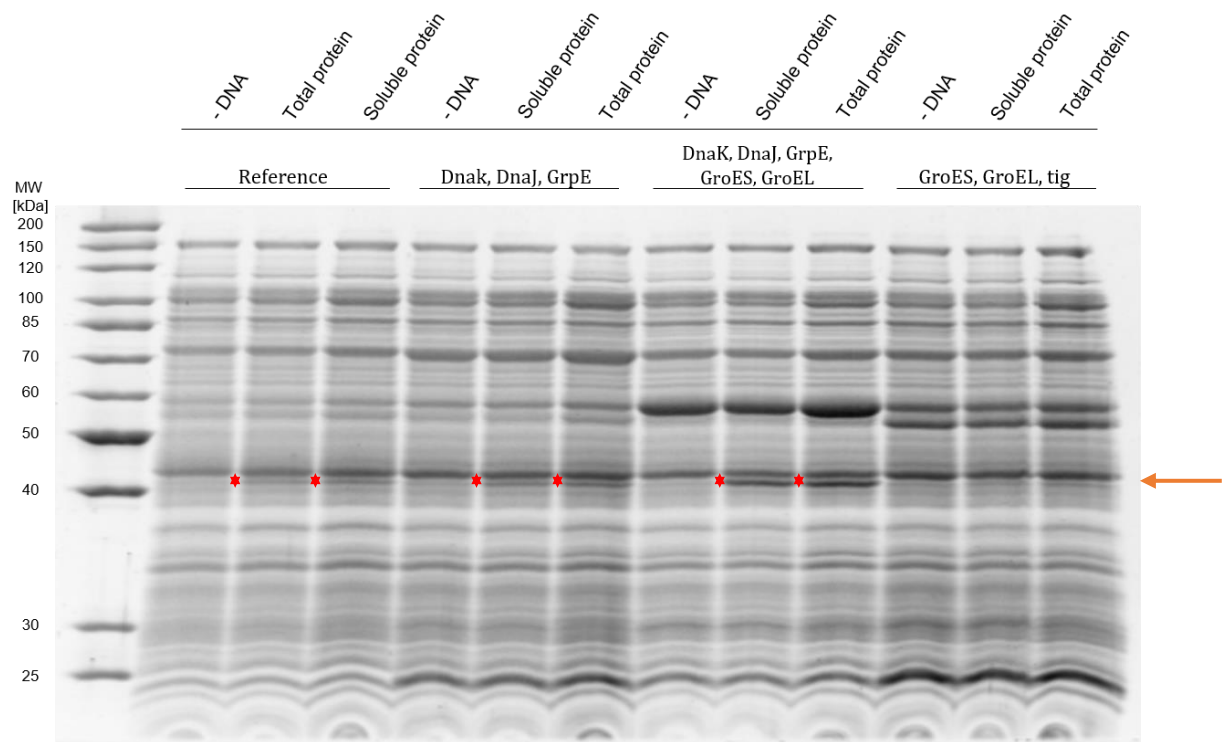

Figure S 21 Nkor-KDO (42.9 kDa) + Chaperones (DnaK, DnaJ, GrpE; DnaK, DnaJ, GrpE, GroES, GroEL; GroES, GroEL, tig)

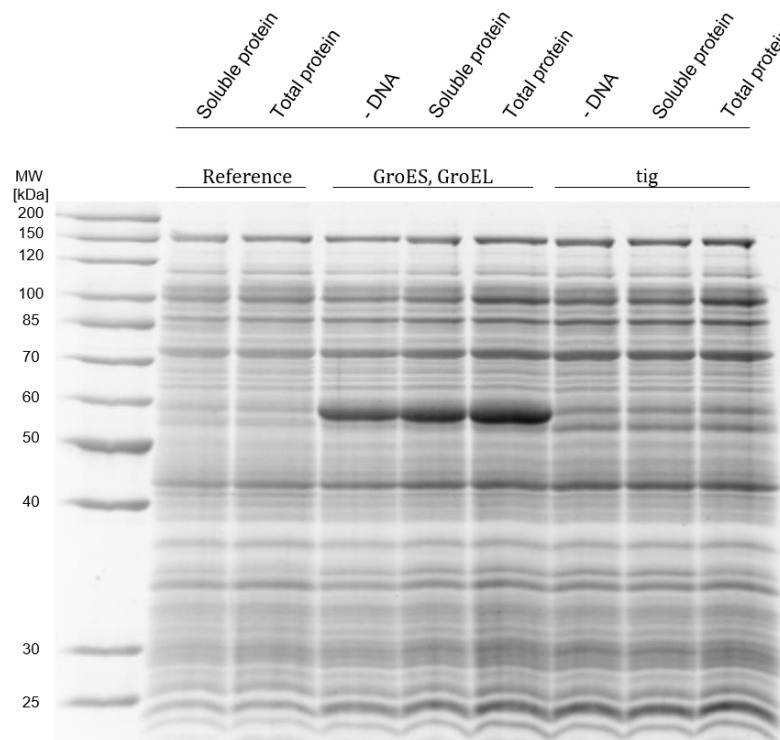

Figure S 22 Nkor-KDO (42.9 kDa) + Chaperones (GroES, GroEL; tig)

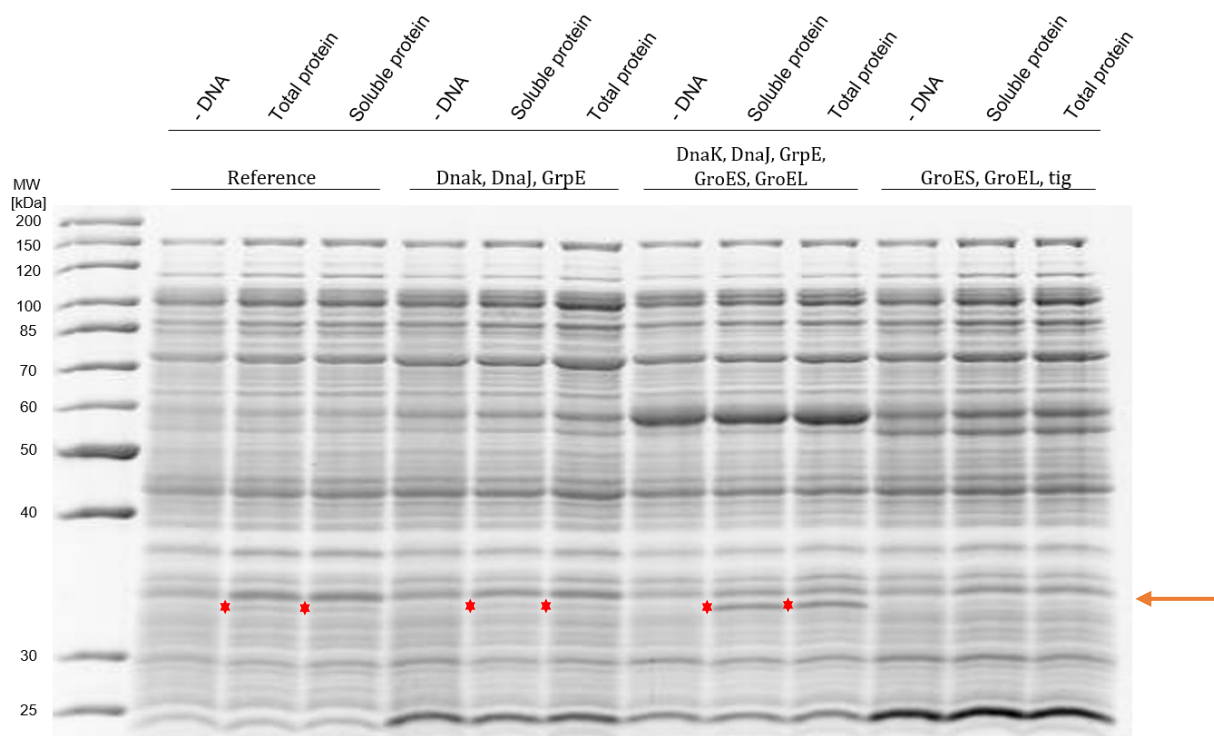

Figure S 23 Pbra-KDO (32.5 kDa) + Chaperones (DnaK, DnaK, GrpE; DnaK, DnaK, GrpE, GroES, GroEL; GroES, GroEL, tig)

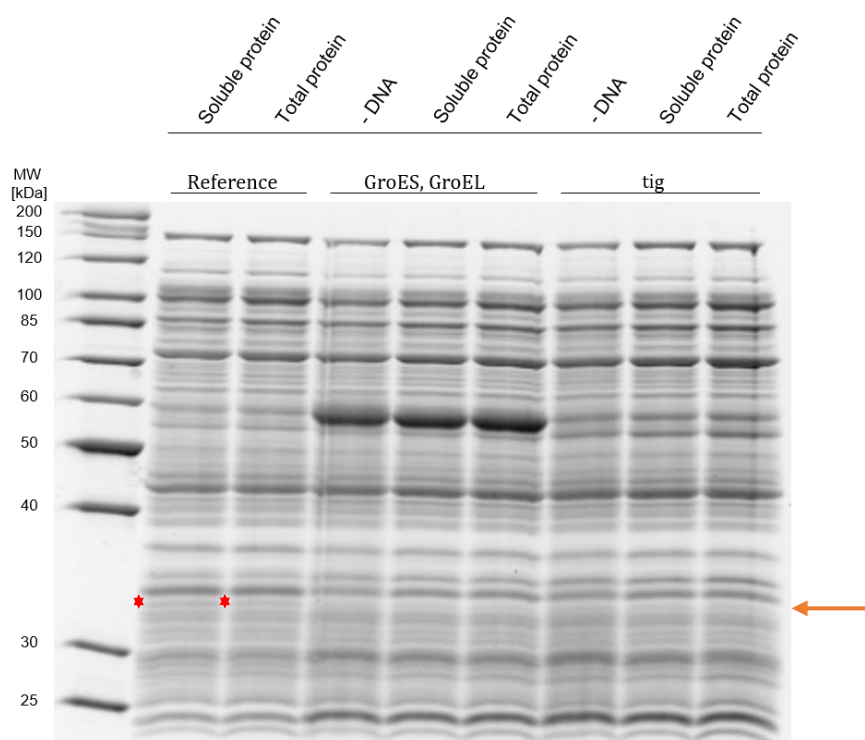

Figure S 24 Pbra-KDO (32.5 kDa) + Chaperones (GroES, GroEL; tig)

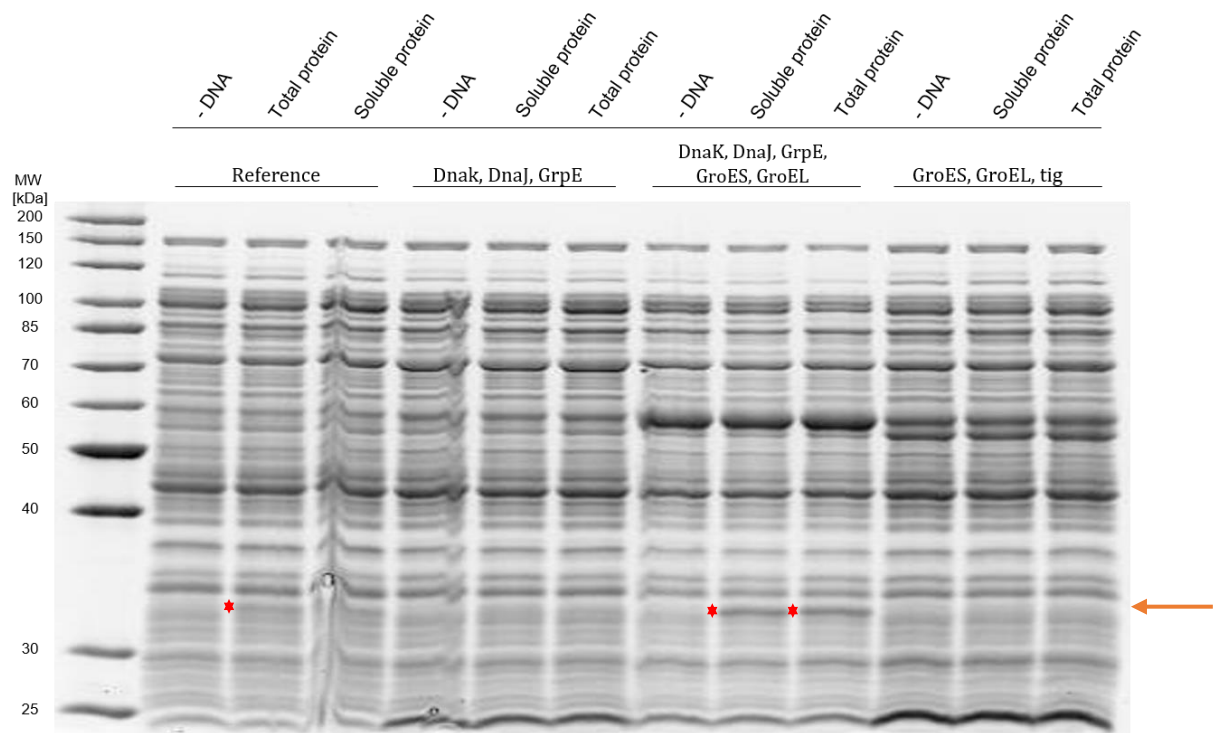

Figure S 25 Plum-KDO (31.8 kDA) + Chaperones (DnaK, DnaJ, GrpE; DnaK, DnaJ, GrpE, GroES, GroEL; GroES, GroEL, tig)

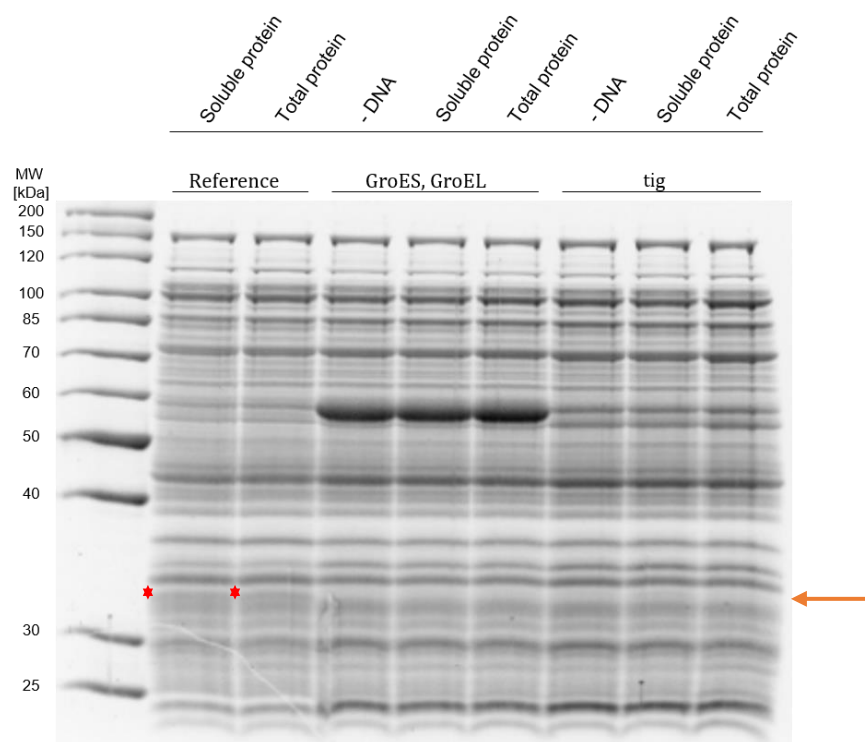

Figure S 26 Plum-KDO (31.8 kDA) + Chaperones (GroES, GroEL; tig)
